# Supplementary material
Source: PubMed Central journal article supplement (PMC5510570)
Supplement: NIHMS873825-supplement-pdf.pdf [file NIHMS873825-supplement-pdf.pdf]

## Supporting Information

### Synthesis and Spectroscopic Investigation of a Series of Push-Pull Boron Dipyrromethenes

#### (BODIPYs)

Sunting Xuan,<sup>†</sup> Ning Zhao,<sup>†</sup> Xiangyi Ke,<sup>‡</sup> Zehua Zhou,<sup>†</sup> Frank R. Fronczek,<sup>†</sup> Karl M. Kadish,<sup>‡</sup>

Kevin M. Smith<sup>†</sup> and M. Graça H. Vicente\*

<sup>†</sup>*Department of Chemistry, Louisiana State University, Baton Rouge, Louisiana 70803, United States*

<sup>‡</sup>*Department of Chemistry, University of Houston, Houston, Texas 77204-5003, United States*

\*Corresponding author: [vicente@lsu.edu](mailto:vicente@lsu.edu)

#### Table of Contents

|                                                                           |     |
|---------------------------------------------------------------------------|-----|
| <b>Figure S1.</b> <sup>1</sup> H NMR spectrum of BODIPY <b>5a</b> .....   | S4  |
| <b>Figure S2.</b> <sup>13</sup> C NMR spectrum of BODIPY <b>5a</b> .....  | S4  |
| <b>Figure S3.</b> <sup>1</sup> H NMR spectrum of BODIPY <b>5b</b> .....   | S5  |
| <b>Figure S4.</b> <sup>13</sup> C NMR spectrum of BODIPY <b>5b</b> .....  | S5  |
| <b>Figure S5.</b> <sup>1</sup> H NMR spectrum of BODIPY <b>2</b> .....    | S6  |
| <b>Figure S6.</b> <sup>13</sup> C NMR spectrum of BODIPY <b>2</b> .....   | S6  |
| <b>Figure S7.</b> <sup>1</sup> H NMR spectrum of BODIPY <b>6a</b> .....   | S7  |
| <b>Figure S8.</b> <sup>13</sup> C NMR spectrum of BODIPY <b>6a</b> .....  | S7  |
| <b>Figure S9.</b> <sup>1</sup> H NMR spectrum of BODIPY <b>6b</b> .....   | S8  |
| <b>Figure S10.</b> <sup>13</sup> C NMR spectrum of BODIPY <b>6b</b> ..... | S8  |
| <b>Figure S11.</b> <sup>1</sup> H NMR spectrum of BODIPY <b>3</b> .....   | S9  |
| <b>Figure S12.</b> <sup>13</sup> C NMR spectrum of BODIPY <b>3</b> .....  | S9  |
| <b>Figure S13.</b> <sup>1</sup> H NMR spectrum of BODIPY <b>7</b> .....   | S10 |
| <b>Figure S14.</b> <sup>13</sup> C NMR spectrum of BODIPY <b>7</b> .....  | S10 |
| <b>Figure S15.</b> <sup>1</sup> H NMR spectrum of BODIPY <b>4</b> .....   | S11 |
| <b>Figure S16.</b> <sup>13</sup> C NMR spectrum of BODIPY <b>4</b> .....  | S11 |
| <b>Figure S17.</b> <sup>1</sup> H NMR spectrum of BODIPY <b>8</b> .....   | S12 |
| <b>Figure S18.</b> <sup>13</sup> C NMR spectrum of BODIPY <b>8</b> .....  | S12 |
| <b>Figure S19.</b> <sup>11</sup> B NMR spectrum of BODIPY <b>5a</b> ..... | S13 |
| <b>Figure S20.</b> <sup>11</sup> B NMR spectrum of BODIPY <b>5b</b> ..... | S13 |
| <b>Figure S21.</b> <sup>11</sup> B NMR spectrum of BODIPY <b>2</b> .....  | S14 |
| <b>Figure S22.</b> <sup>11</sup> B NMR spectrum of BODIPY <b>6a</b> ..... | S14 |
| <b>Figure S23.</b> <sup>11</sup> B NMR spectrum of BODIPY <b>6b</b> ..... | S15 |
| <b>Figure S24.</b> <sup>11</sup> B NMR spectrum of BODIPY <b>3</b> .....  | S15 |
| <b>Figure S25.</b> <sup>11</sup> B NMR spectrum of BODIPY <b>4</b> .....  | S16 |

|                                                                                                                                                                                                                                                                                                                                                                                                                                                                                             |         |
|---------------------------------------------------------------------------------------------------------------------------------------------------------------------------------------------------------------------------------------------------------------------------------------------------------------------------------------------------------------------------------------------------------------------------------------------------------------------------------------------|---------|
| <b>Figure S26.</b> $^{11}\text{B}$ NMR spectrum of BODIPY <b>7</b> .                                                                                                                                                                                                                                                                                                                                                                                                                        | S16     |
| <b>Figure S27.</b> $^{11}\text{B}$ NMR spectrum of BODIPY <b>8</b> .                                                                                                                                                                                                                                                                                                                                                                                                                        | S17     |
| <b>Figure S28.</b> Dihedral angles of the meso substituent with the 12-atom BODIPY core for BODIPY <b>2</b> , <b>6a</b> , <b>6b</b> , <b>4</b> , <b>7</b> , and <b>8</b> : the purple and green plane corresponds to the 12-atom BODIPY and the meso substituent, respectively.                                                                                                                                                                                                             | S18     |
| <b>Figure S29.</b> Dihedral angles of the 2,6 substituents with the 12-atom BODIPY core for BODIPY <b>7</b> : (A, B) is the front view and (C,D) is the side view. The purple and green plane corresponds to the 12-atom BODIPY and the 2,6 substituents, respectively.                                                                                                                                                                                                                     | S199    |
| <b>Figure S30.</b> Dihedral angles of the 2,6 substituents with the 12-atom BODIPY core for BODIPY <b>4</b> : (A, B) is the front view and (C,D) is the side view. The purple and green plane corresponds to the 12-atom BODIPY and the 2,6 substituents, respectively.                                                                                                                                                                                                                     | S20     |
| <b>Figure S31.</b> Dihedral angles of the 2,6 substituents with the 12-atom BODIPY core for BODIPY <b>8</b> : (A, B) is the front view and (C,D) is the side view. The purple and green plane corresponds to the 12-atom BODIPY and the 2,6 substituents, respectively.                                                                                                                                                                                                                     | S21     |
| <b>Figure S32.</b> Dihedral angles of the 3,5 substituents with the 12-atom BODIPY core for BODIPY <b>2</b> , <b>6a</b> , <b>6b</b> , <b>4</b> , <b>7</b> , and <b>8</b> : the green and red plane corresponds to the 12-atom BODIPY and the 2,6 substituents, respectively.                                                                                                                                                                                                                | S222    |
| <b>Figure S33.</b> Absorbance (A) and fluorescence (B) spectra of BODIPY <b>2</b> in toluene, tetrahydrofuran and acetonitrile.                                                                                                                                                                                                                                                                                                                                                             | S233    |
| <b>Figure S34.</b> Absorbance (A) and fluorescence (B) spectra of BODIPY <b>6a</b> in toluene, tetrahydrofuran and acetonitrile.                                                                                                                                                                                                                                                                                                                                                            | S233    |
| <b>Figure S35.</b> Absorbance (A) and fluorescence (B) spectra of BODIPY <b>6b</b> in toluene, tetrahydrofuran and acetonitrile.                                                                                                                                                                                                                                                                                                                                                            | S244    |
| <b>Figure S36.</b> Absorbance (A) and fluorescence (B) spectra of BODIPY <b>3</b> in toluene, tetrahydrofuran and acetonitrile.                                                                                                                                                                                                                                                                                                                                                             | S244    |
| <b>Figure S37.</b> Absorbance (A) and fluorescence (B) spectra of BODIPY <b>7</b> in toluene, tetrahydrofuran and acetonitrile.                                                                                                                                                                                                                                                                                                                                                             | S255    |
| <b>Figure S38.</b> Absorbance (A) and fluorescence (B) spectra of BODIPY <b>4</b> in toluene, tetrahydrofuran and acetonitrile.                                                                                                                                                                                                                                                                                                                                                             | S255    |
| <b>Figure S39.</b> Absorbance (A) and fluorescence (B) spectra of BODIPY <b>8</b> in toluene, tetrahydrofuran and acetonitrile.                                                                                                                                                                                                                                                                                                                                                             | S266    |
| <b>Table S1.</b> Half-wave potentials (V vs. SCE) for the investigated BODIPYs in $\text{CH}_3\text{CN}$ and THF, 0.1 M TBAP.                                                                                                                                                                                                                                                                                                                                                               | S266    |
| <b>Table S2.</b> The DFT calculated atom coordinates and their absolute energies for BODIPYs..                                                                                                                                                                                                                                                                                                                                                                                              | S267-38 |
| <b>Figure S40.</b> DFT calculated frontier orbitals for all the BODIPY <b>2</b> , <b>3</b> , <b>4</b> , <b>6a</b> , <b>6b</b> , <b>7</b> and <b>8</b> (B3LYP/6-31G(d)).                                                                                                                                                                                                                                                                                                                     | S388    |
| <b>Table S3.</b> DFT calculated molecular orbital energy levels for the BODIPYs.                                                                                                                                                                                                                                                                                                                                                                                                            | S399    |
| <b>Figure S41.</b> Concentration dependent dark toxicity of BODIPYs in HEp 2 cells.                                                                                                                                                                                                                                                                                                                                                                                                         | S399    |
| <b>Figure S42.</b> Concentration dependent phototoxicity ( $1.5 \text{ J/cm}^2$ light dose) of BODIPYs in HEp 2 cells.                                                                                                                                                                                                                                                                                                                                                                      | S40     |
| <b>Figure S43.</b> Subcellular localization of <b>2</b> (left) and <b>3</b> (right) in HEp2 cells at $10 \mu\text{M}$ for 6 h. (a) phase contrast, (b) overlay of BODIPY and phase contrast, (c) ER Tracker Blue/White, (d) overlay of BODIPY and ER Tracker, (e) BODIPY Ceramide, (f) overlay of BODIPY and BODIPY Ceramide, (g) MitoTracker Green, (h) overlay of BODIPY and MitoTracker, (i) LysoSensor Green, (j) overlay of BODIPY and LysoSensor Green. Scale bar: $10 \mu\text{m}$ . | S41     |

**Figure S44.** Subcellular localization of **4** (left) and **6a** (right) in HEp2 cells at 10  $\mu$ M for 6 h. (a) phase contrast, (b) overlay of BODIPY and phase contrast, (c) ER Tracker Blue/White, (d) overlay of BODIPY and ER Tracker, (e) BODIPY Ceramide, (f) overlay of BODIPY and BODIPY Ceramide, (g) MitoTracker Green, (h) overlay of BODIPY and MitoTracker, (i) LysoSensor Green, (j) overlay of BODIPY and LysoSensor Green. Scale bar: 10  $\mu$ m. ....S42

**Figure S45.** Subcellular localization of **7** in HEp2 cells at 10  $\mu$ M for 6 h. (a) phase contrast, (b) overlay of BODIPY and phase contrast, (c) ER Tracker Blue/White, (d) overlay of BODIPY and ER Tracker, (e) BODIPY Ceramide, (f) overlay of BODIPY and BODIPY Ceramide, (g) MitoTracker Green, (h) overlay of BODIPY and MitoTracker, (i) LysoSensor Green, (j) overlay of BODIPY and LysoSensor Green. Scale bar: 10  $\mu$ m. ....S43

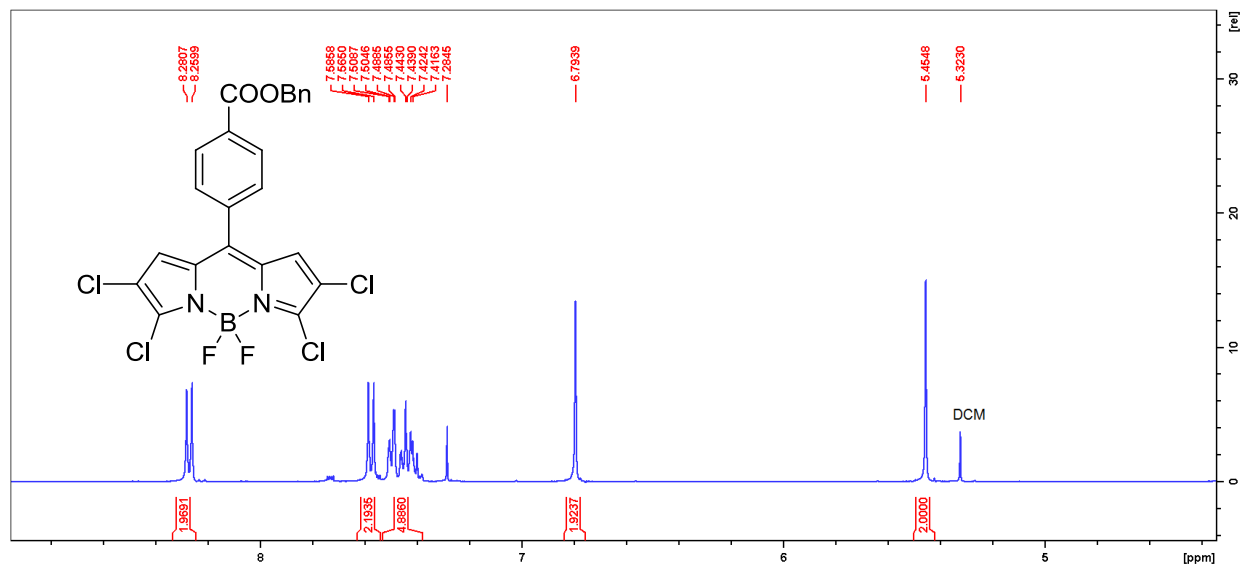

**Figure S1.  $^1\text{H}$  NMR spectrum of BODIPY 5a.**

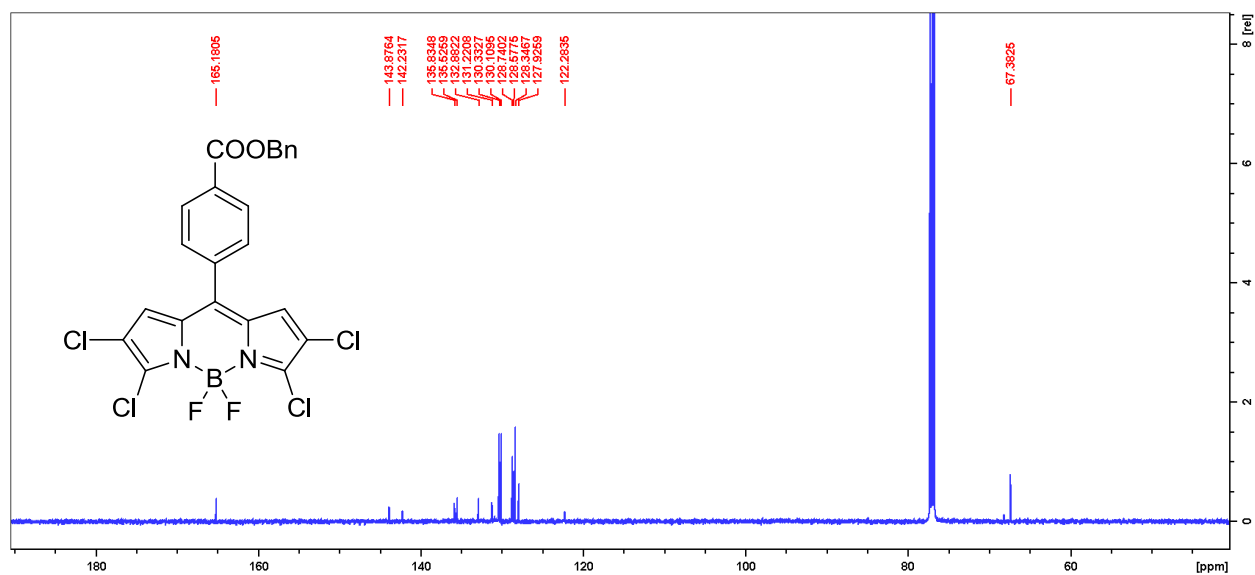

**Figure S2.  $^{13}\text{C}$  NMR spectrum of BODIPY 5a.**

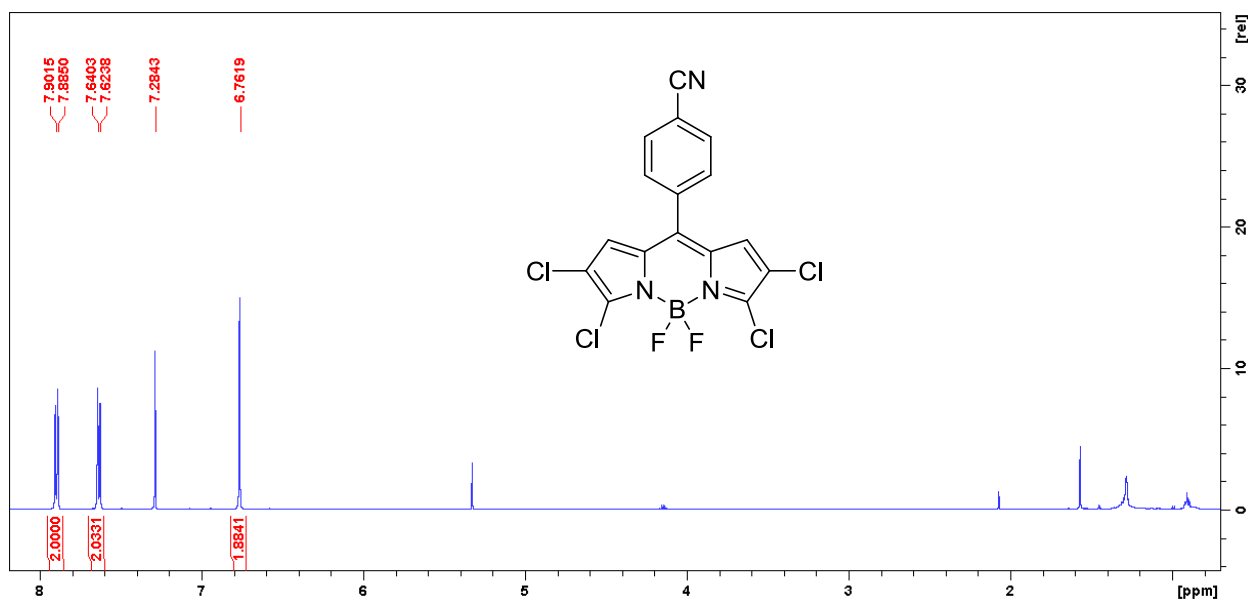

Figure S3.  $^1\text{H}$  NMR spectrum of BODIPY 5b.

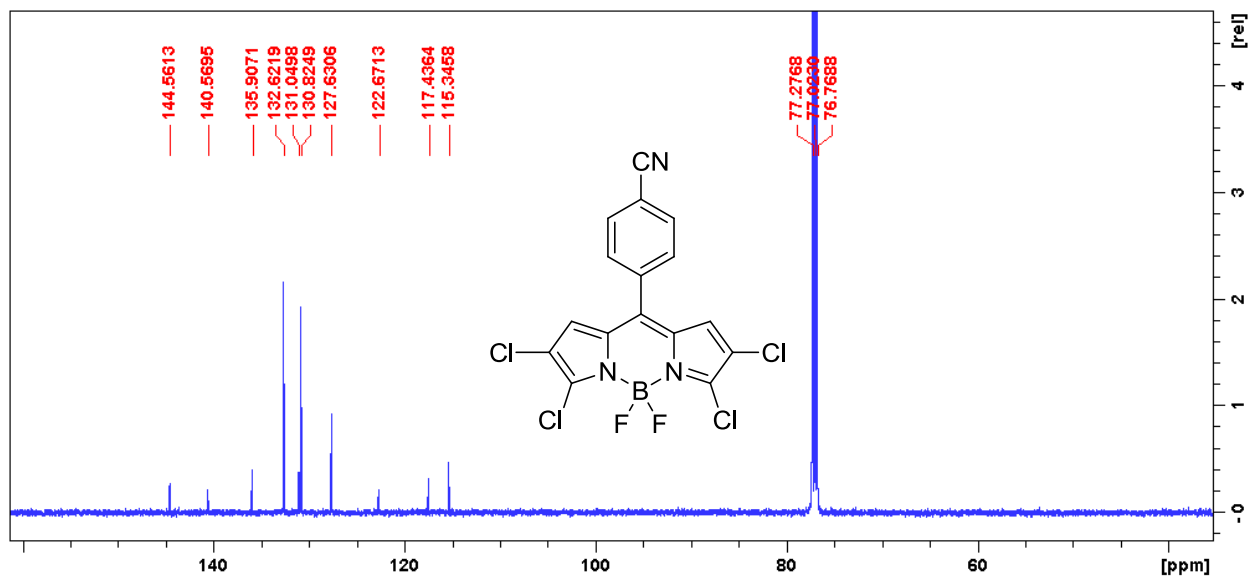

Figure S4.  $^{13}\text{C}$  NMR spectrum of BODIPY 5b.

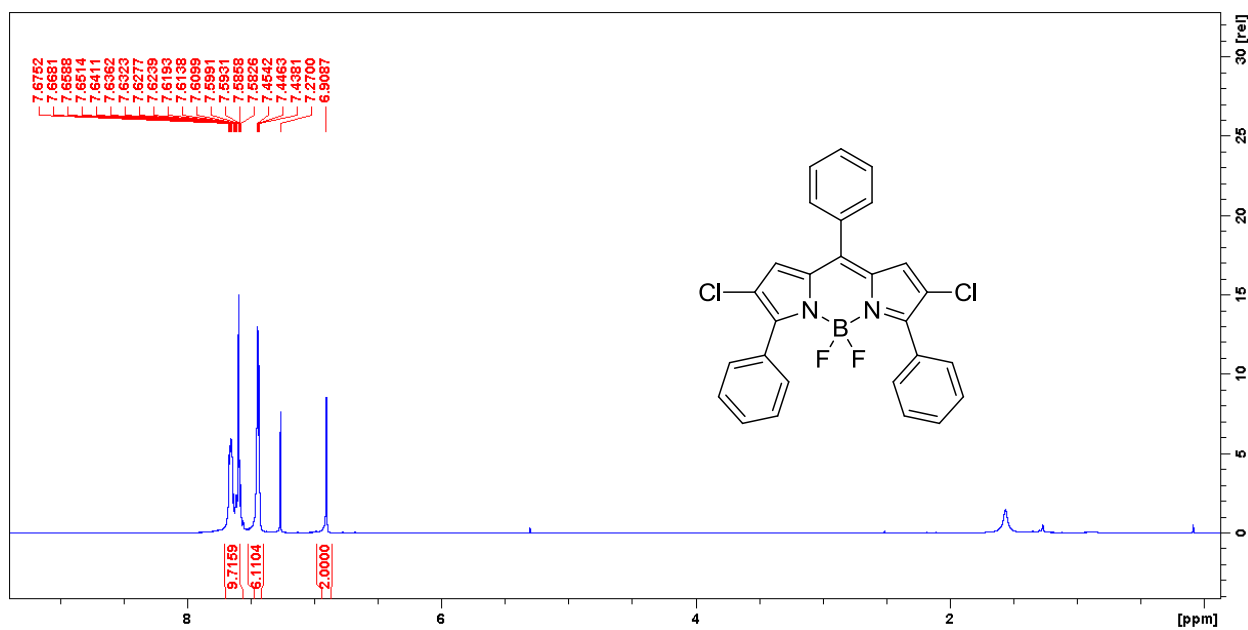

Figure S5.  $^1\text{H}$  NMR spectrum of BODIPY 2.

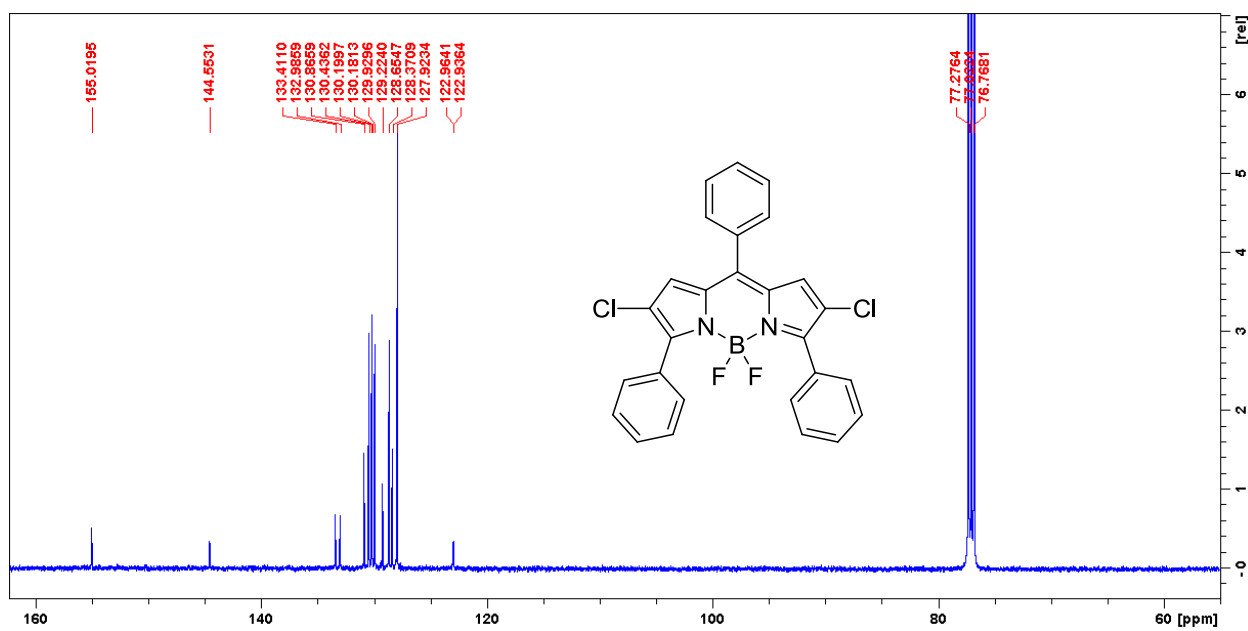

Figure S6.  $^{13}\text{C}$  NMR spectrum of BODIPY 2.

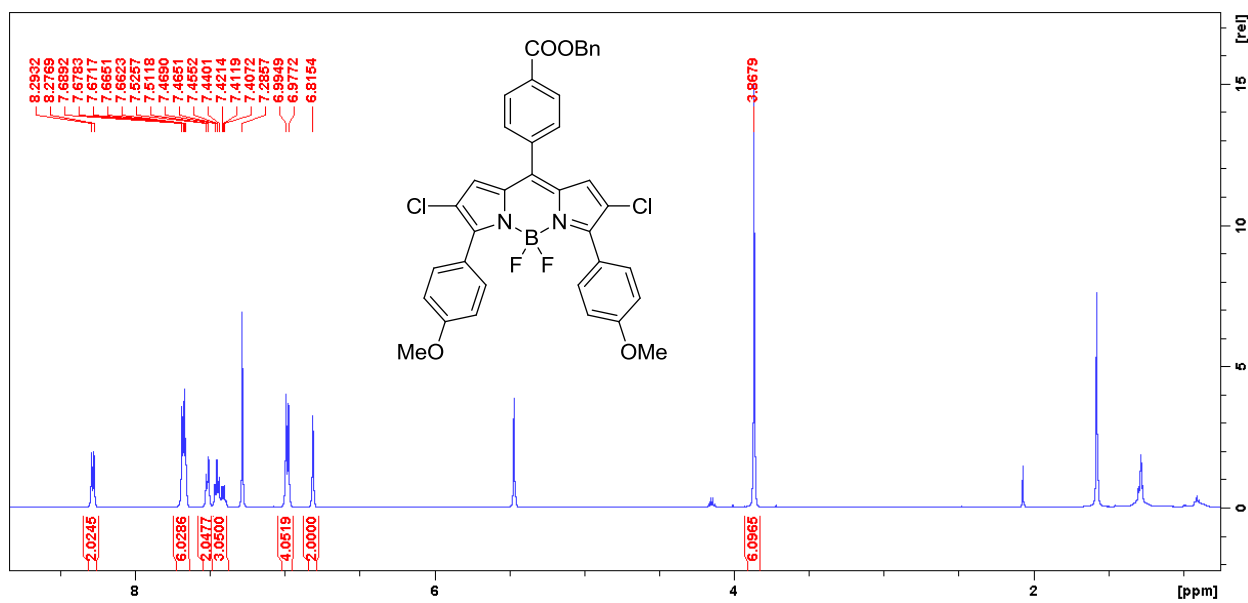

Figure S7.  $^1\text{H}$  NMR spectrum of BODIPY 6a.

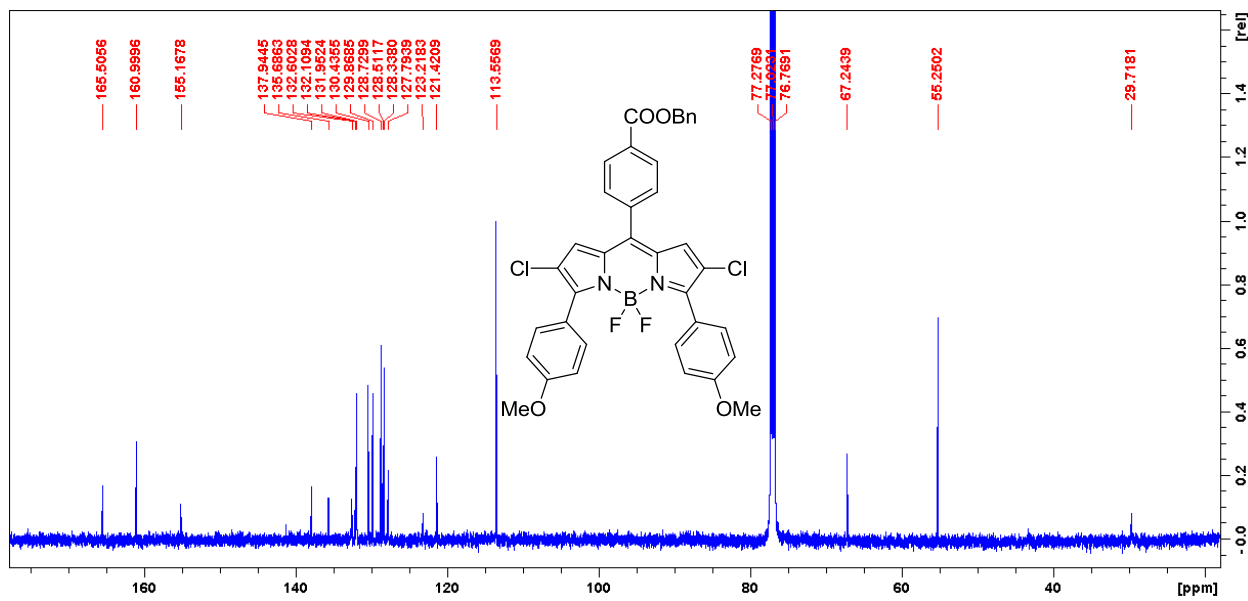

Figure S8.  $^{13}\text{C}$  NMR spectrum of BODIPY 6a.

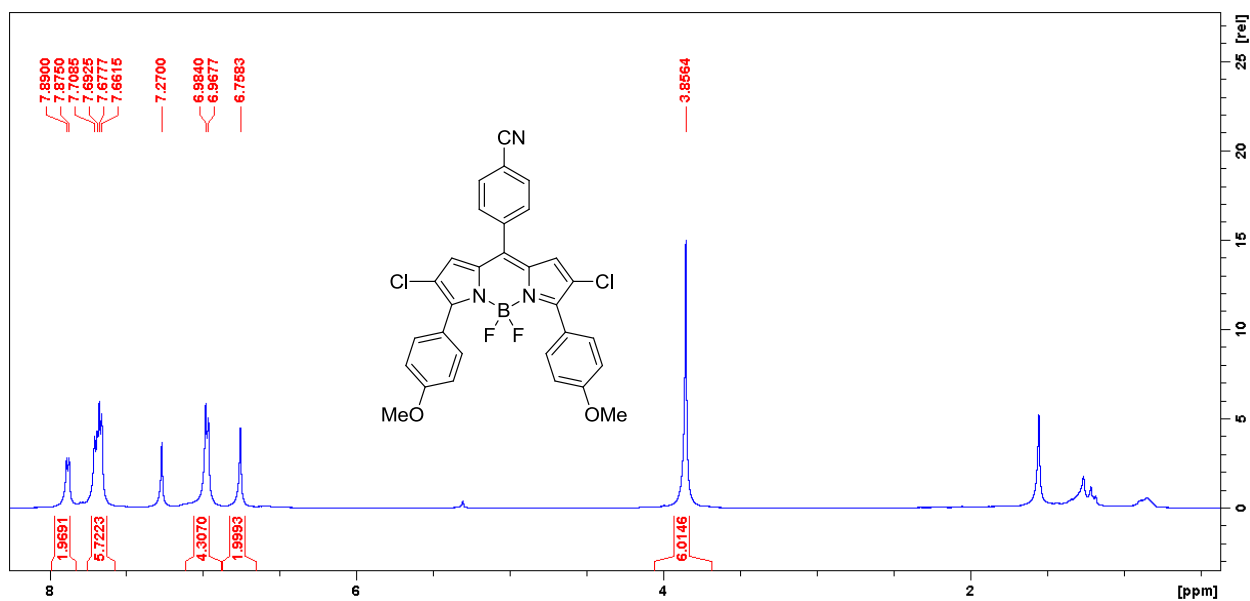

Figure S9.  $^1\text{H}$  NMR spectrum of BODIPY 6b.

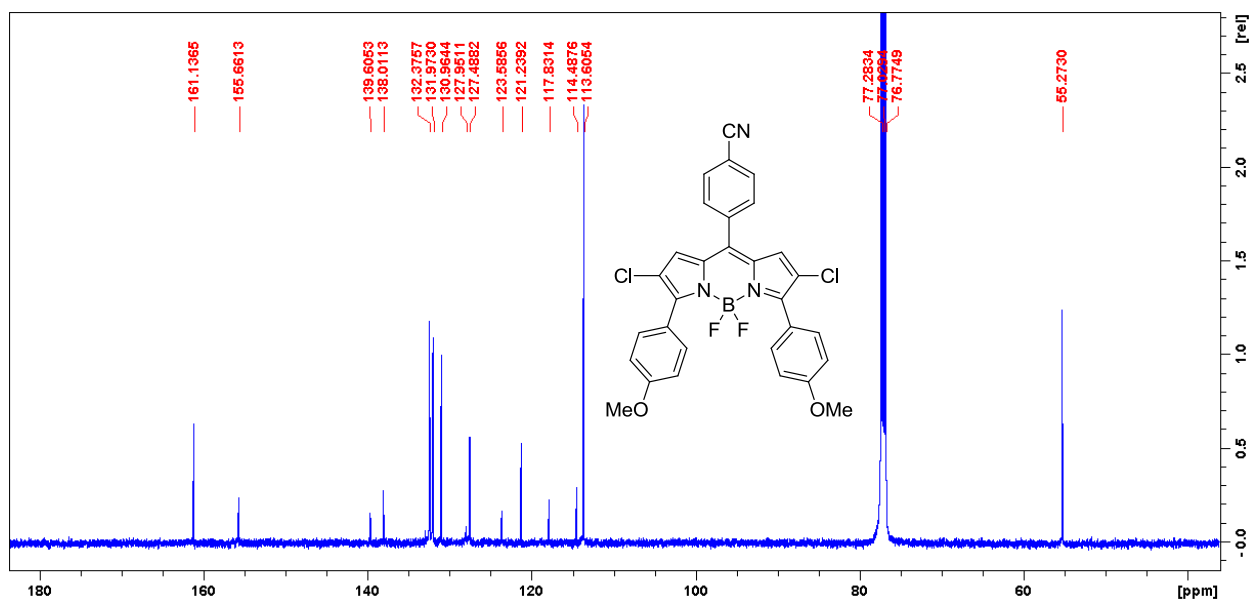

Figure S10.  $^{13}\text{C}$  NMR spectrum of BODIPY 6b.



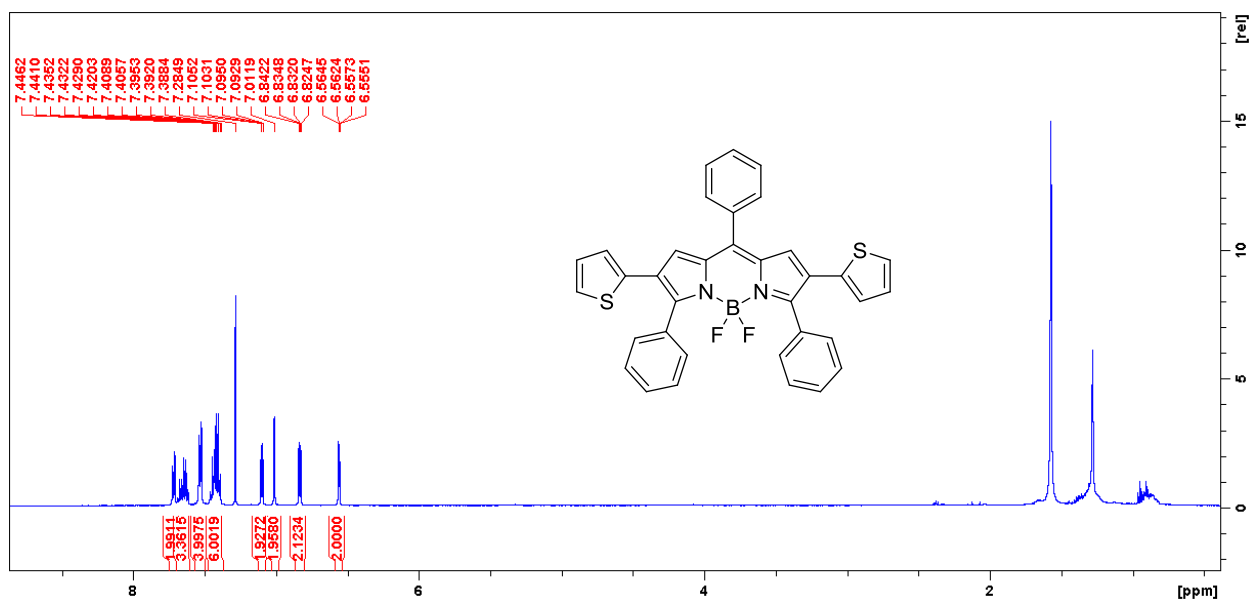

**Figure S11. <sup>1</sup>H NMR spectrum of BODIPY 3.**

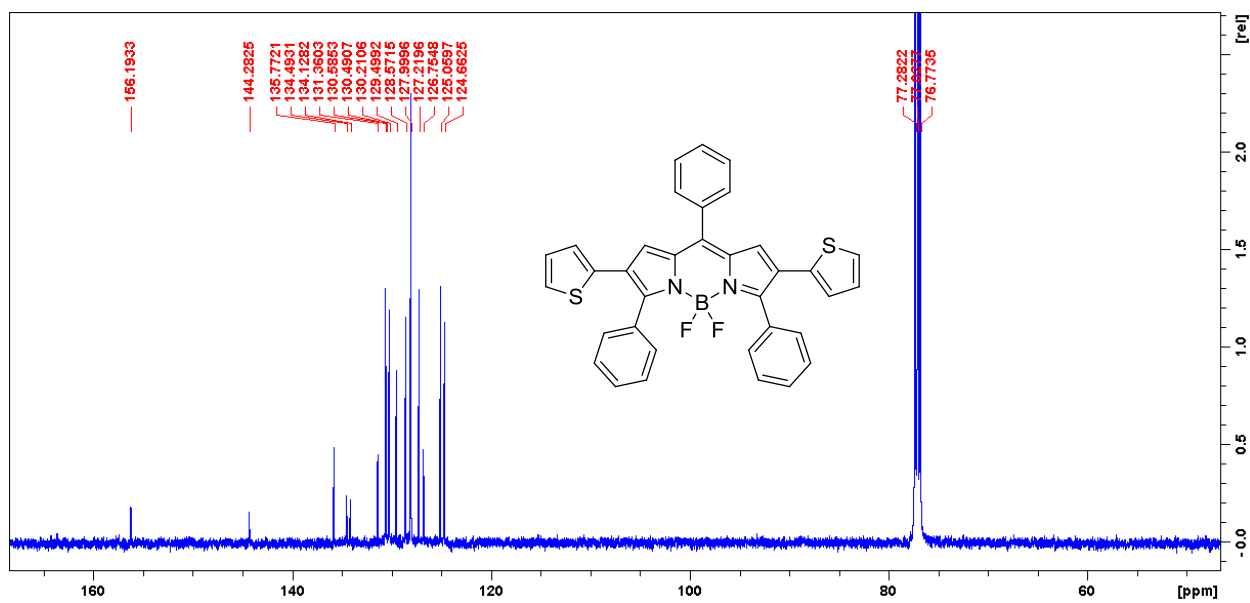

**Figure S12. <sup>13</sup>C NMR spectrum of BODIPY 3.**

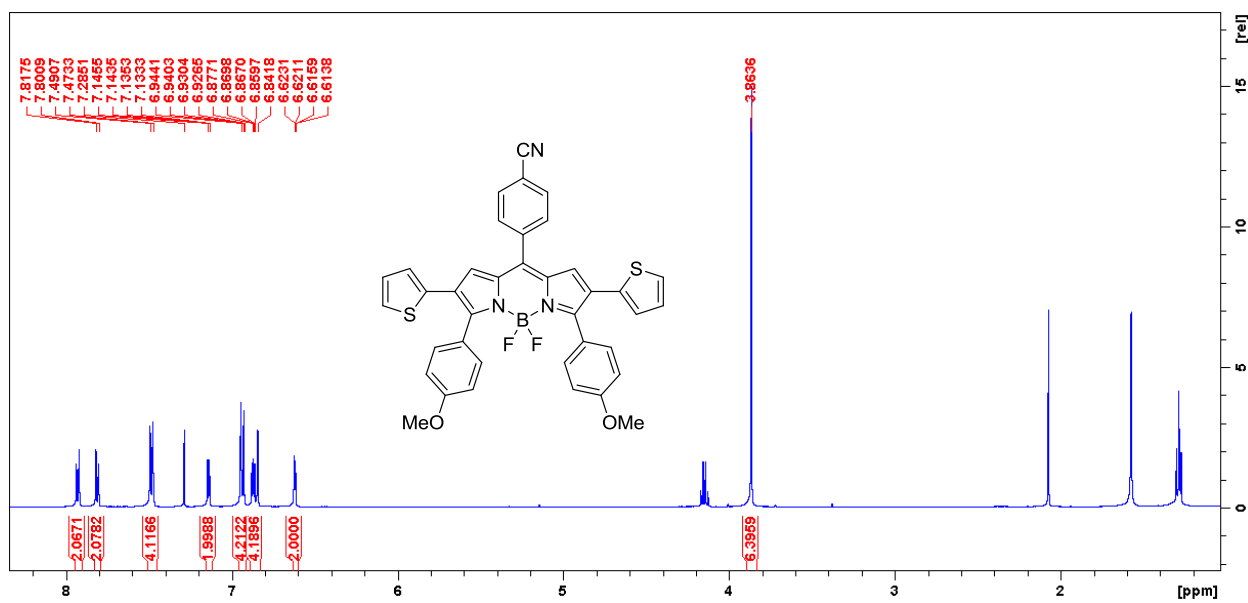

Figure S13. <sup>1</sup>H NMR spectrum of BODIPY 7.

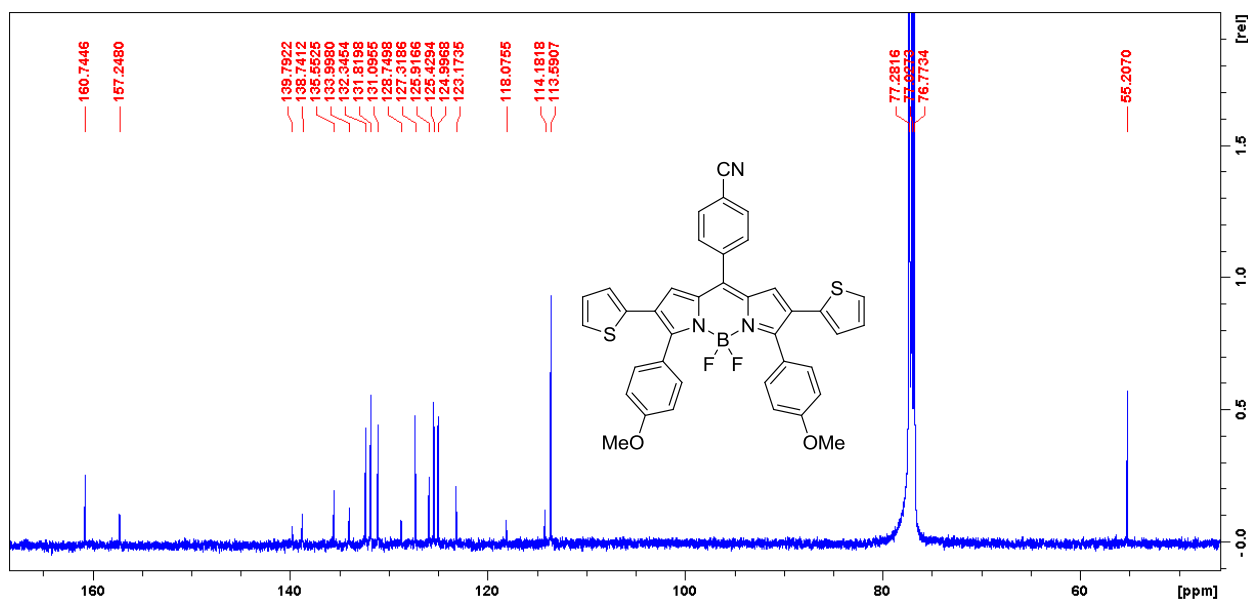

Figure S14. <sup>13</sup>C NMR spectrum of BODIPY 7.

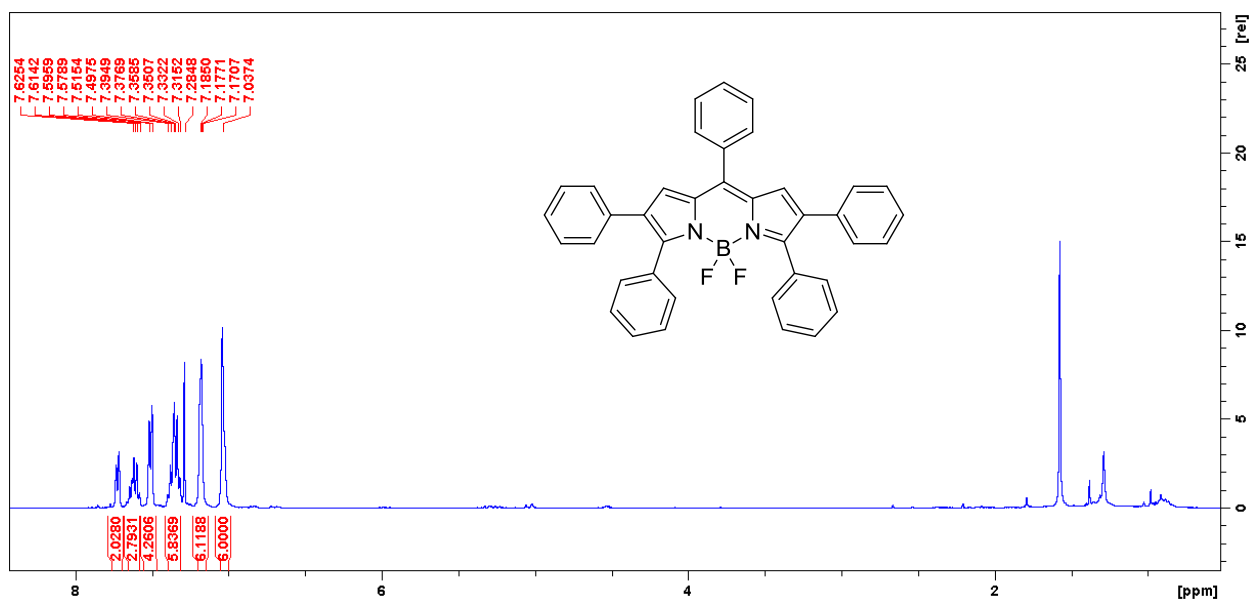

Figure S15.  $^1\text{H}$  NMR spectrum of BODIPY 4.

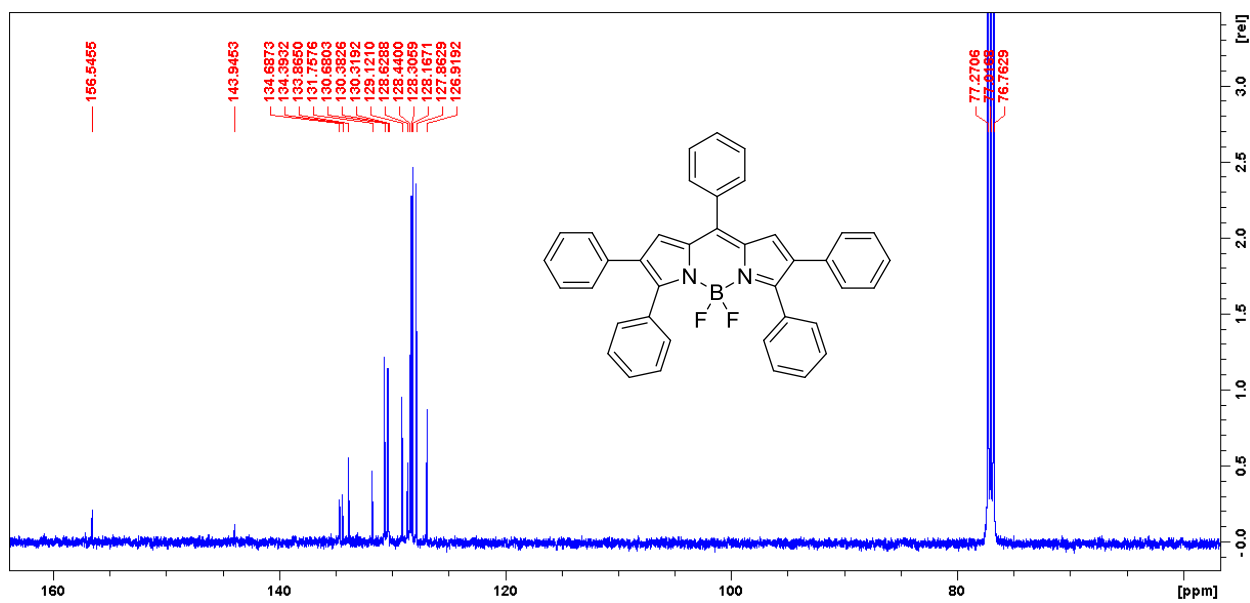

Figure S16.  $^{13}\text{C}$  NMR spectrum of BODIPY 4.

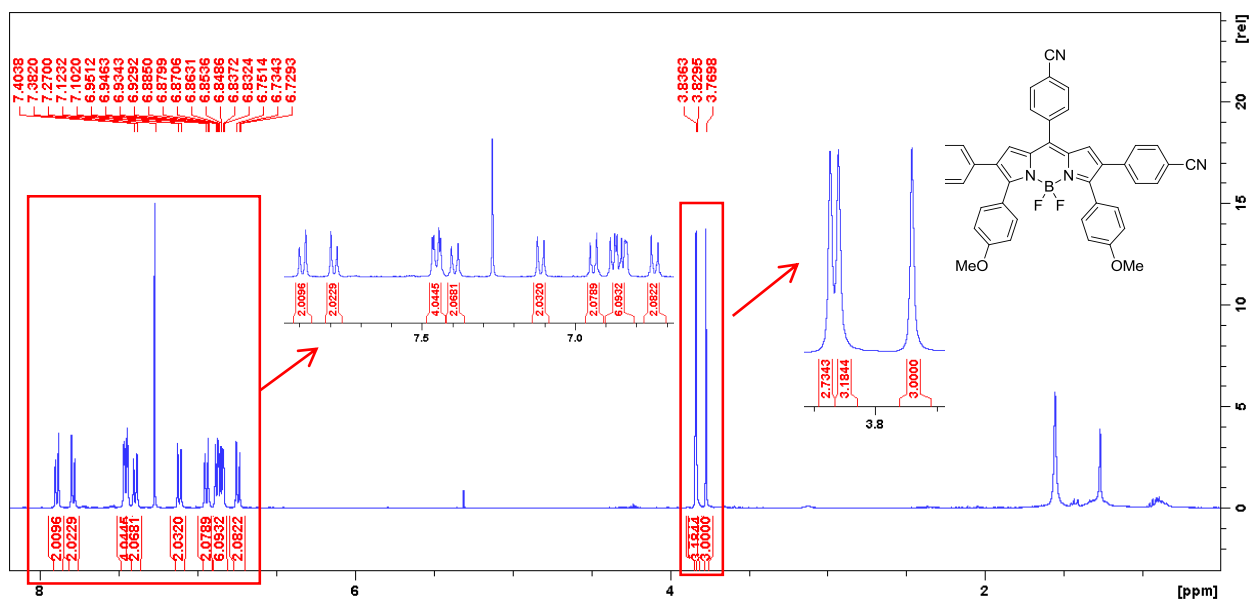

**Figure S17.**  $^1\text{H}$  NMR spectrum of BODIPY **8**.

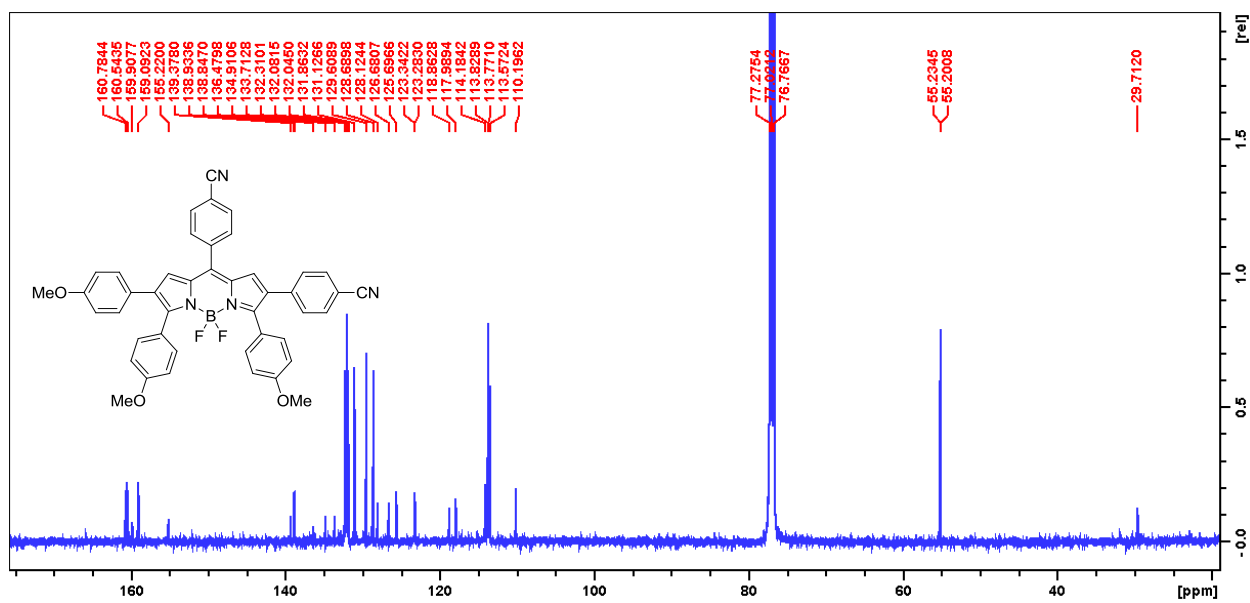

**Figure S18.**  $^{13}\text{C}$  NMR spectrum of BODIPY **8**.

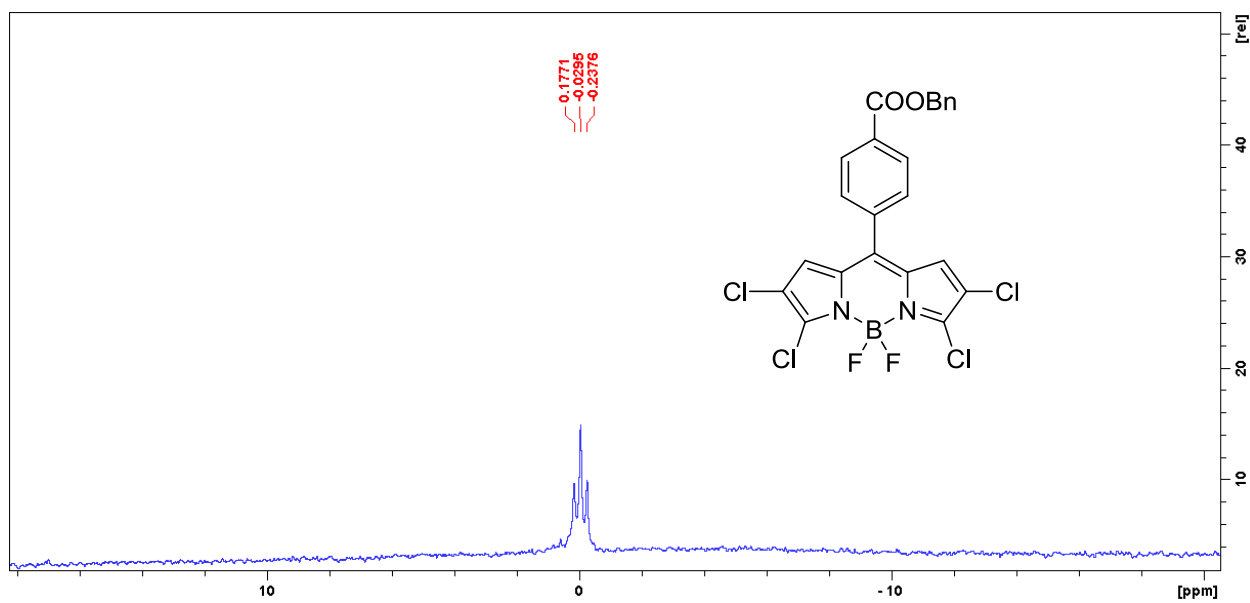

**Figure S19.** <sup>11</sup>B NMR spectrum of BODIPY **5a**.

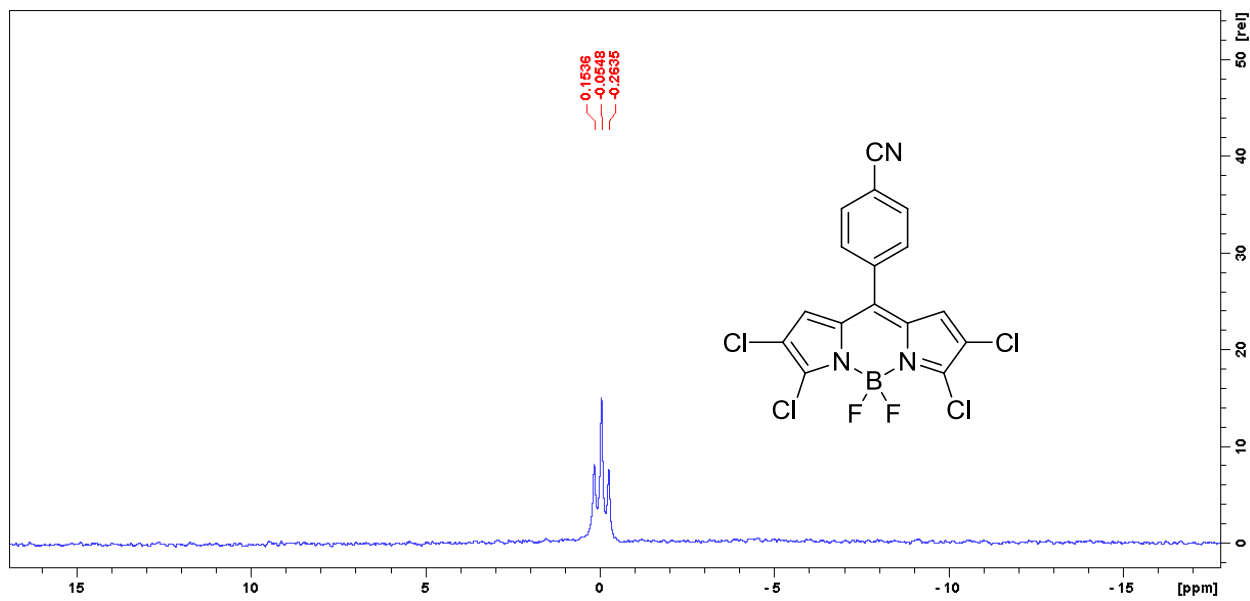

**Figure S20.** <sup>11</sup>B NMR spectrum of BODIPY **5b**.

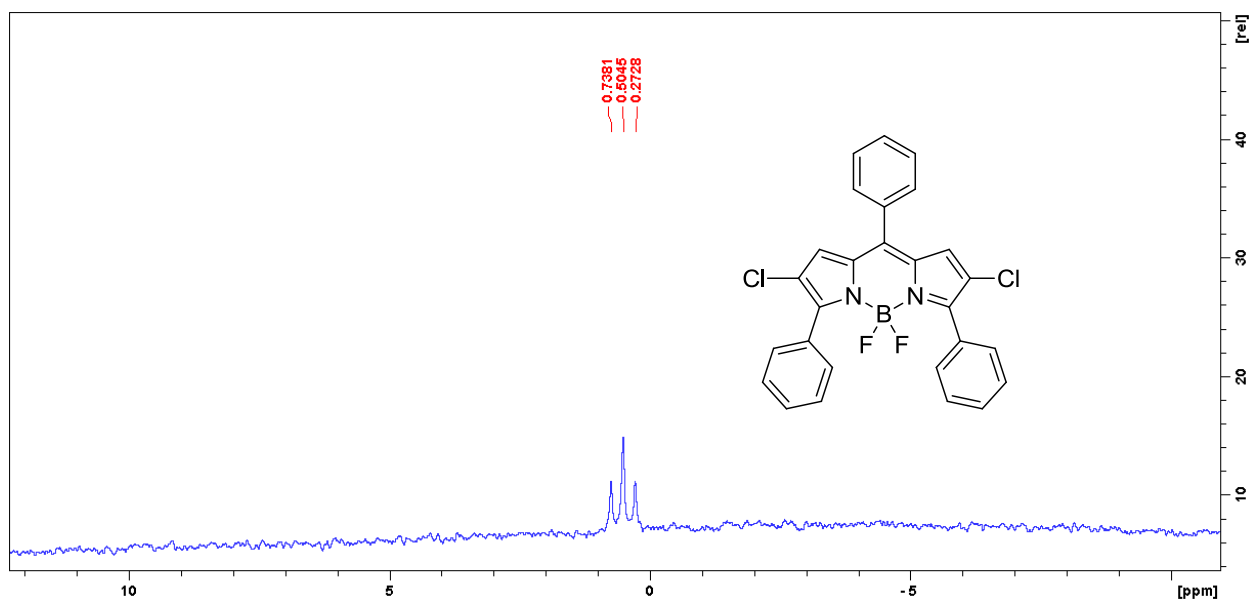

Figure S21.  $^{11}\text{B}$  NMR spectrum of BODIPY **2**.

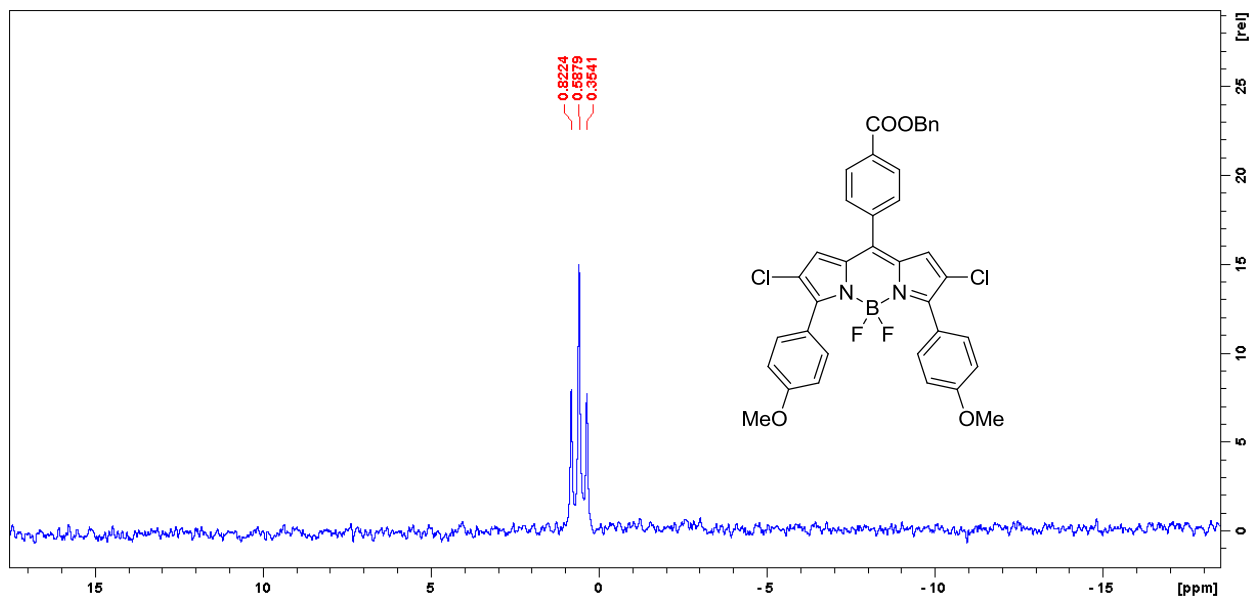

Figure S22.  $^{11}\text{B}$  NMR spectrum of BODIPY **6a**.

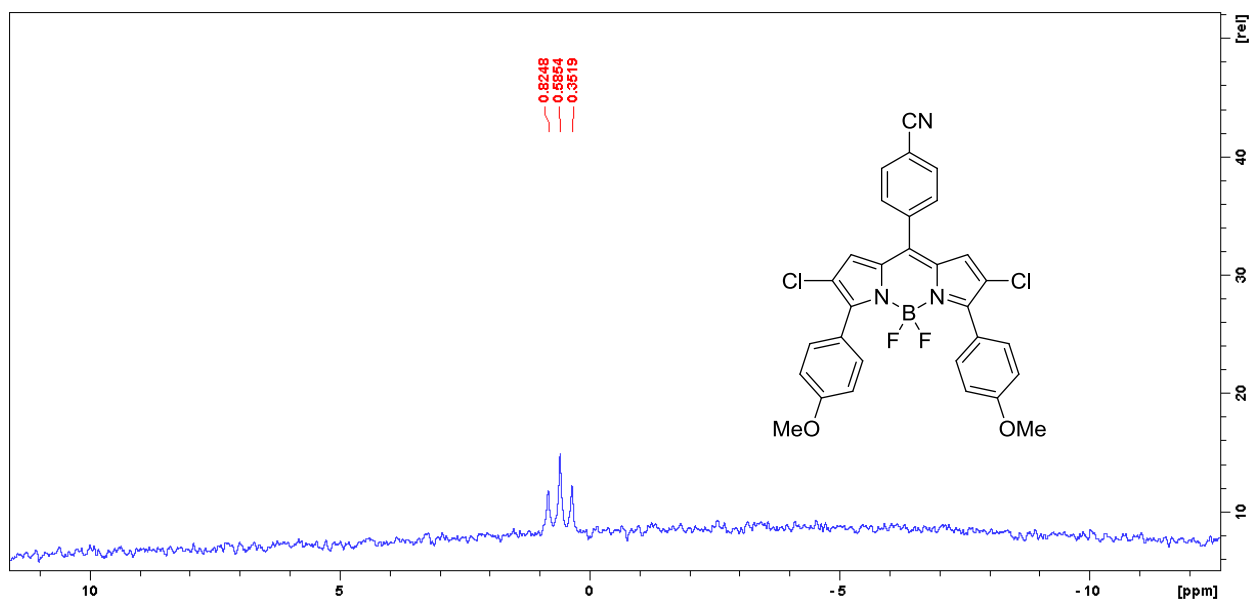

**Figure S23.**  $^{11}\text{B}$  NMR spectrum of BODIPY **6b**.

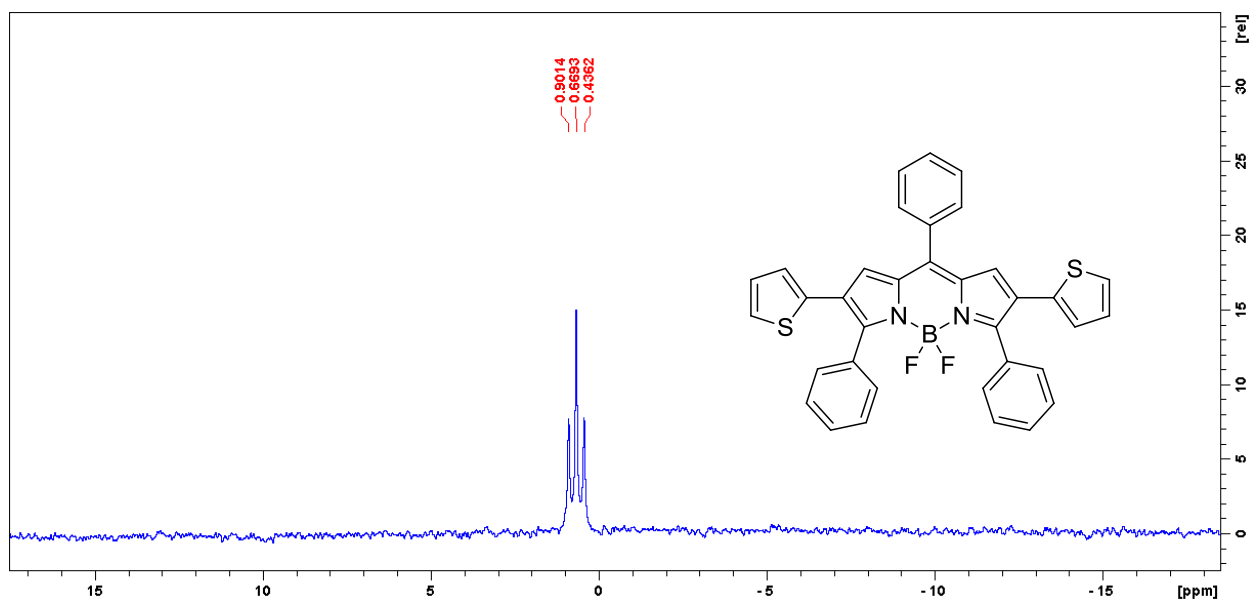

**Figure S24.**  $^{11}\text{B}$  NMR spectrum of BODIPY **3**.

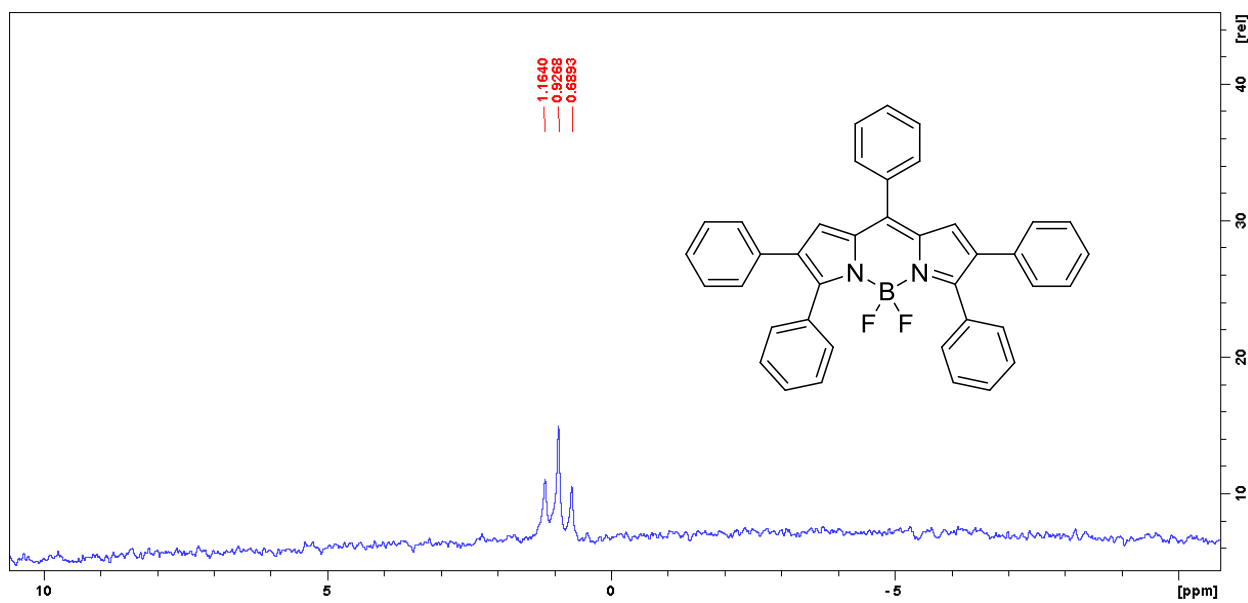

Figure S25.  $^{11}\text{B}$  NMR spectrum of BODIPY 4.

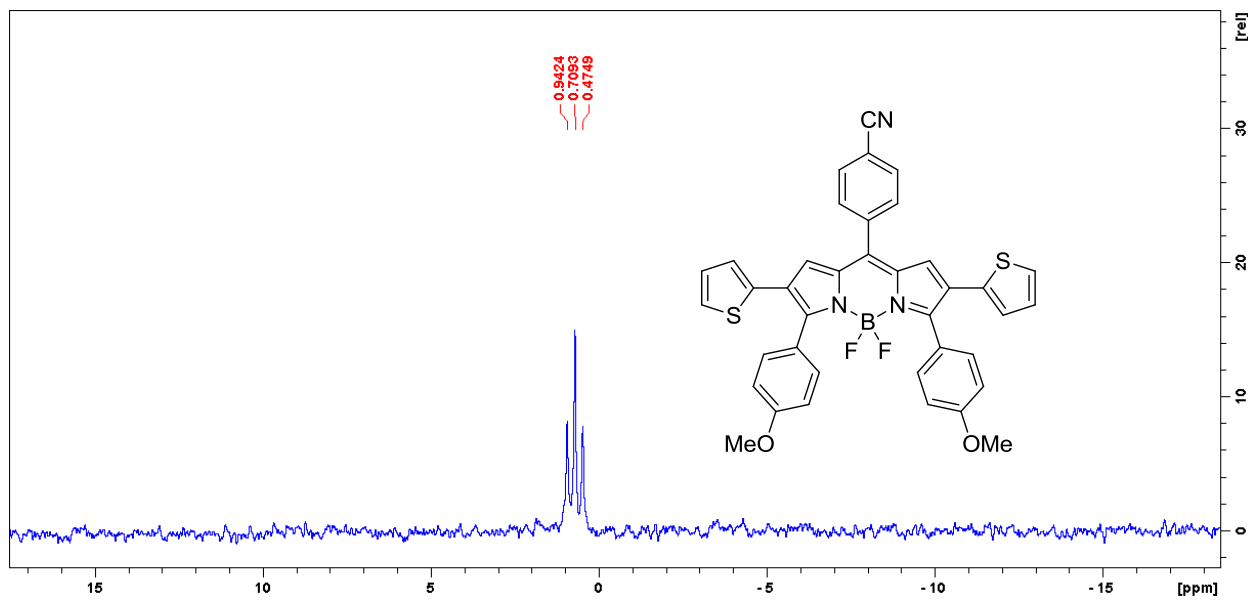

Figure S26.  $^{11}\text{B}$  NMR spectrum of BODIPY 7.



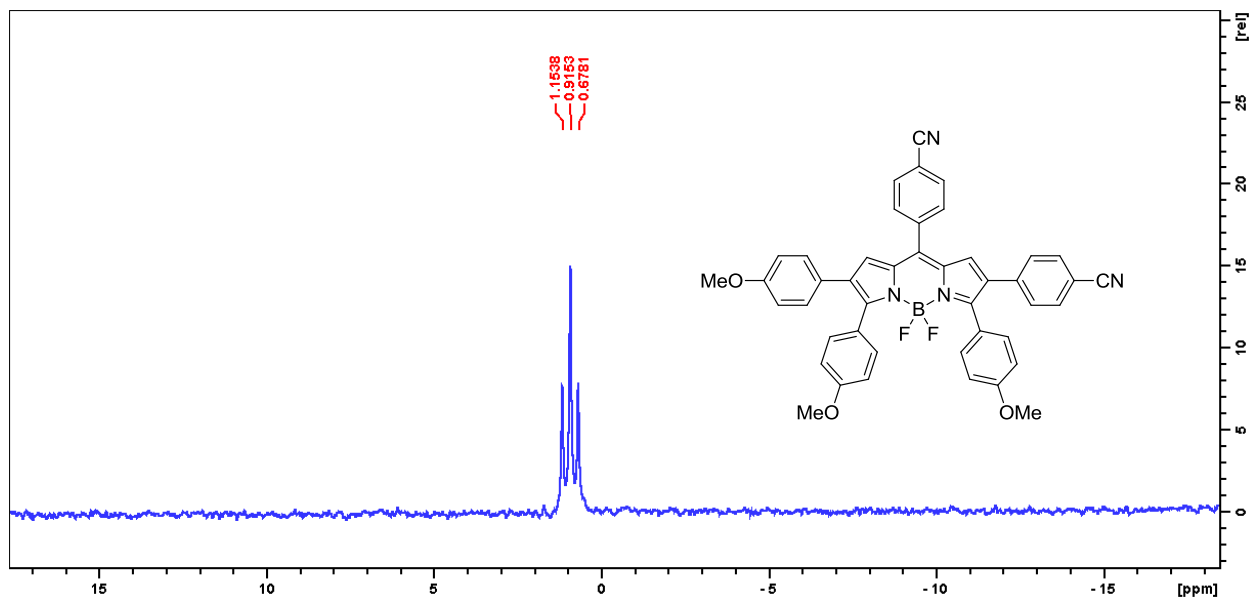

**Figure S27.**  $^{11}\text{B}$  NMR spectrum of BODIPY 8.

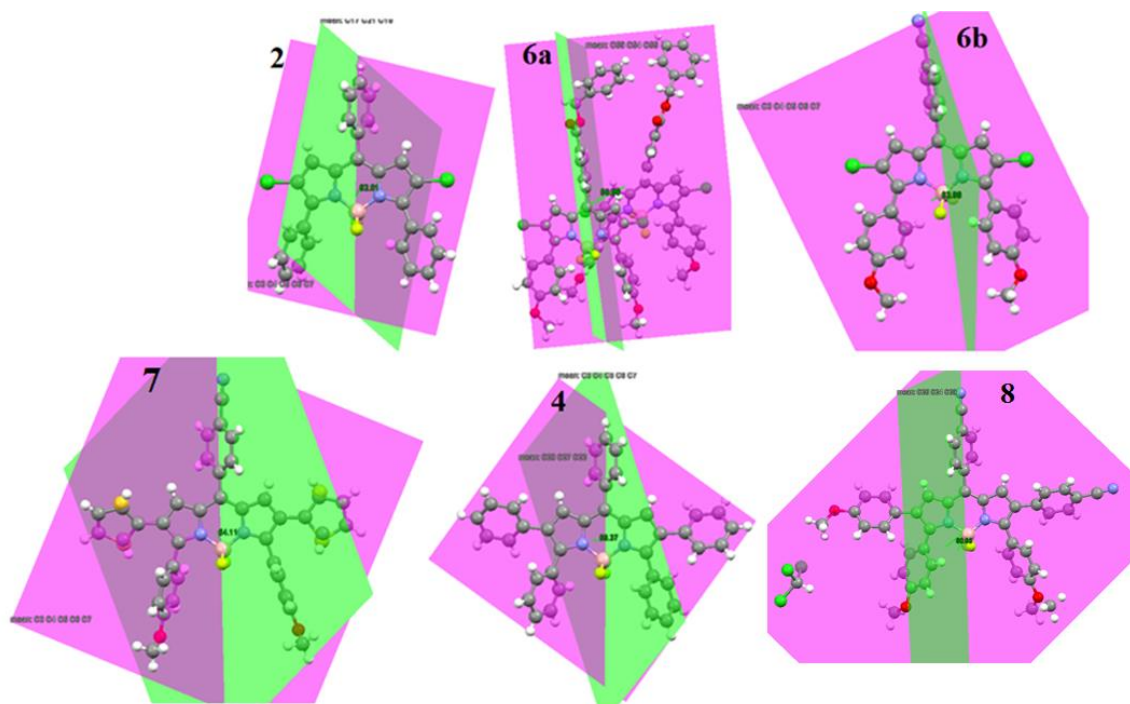

| Cpds               | 2    | 6a   | 6b   | 4    | 7    | 8    |
|--------------------|------|------|------|------|------|------|
| Dihedral angle (°) | 62.0 | 56.6 | 63.7 | 59.4 | 54.1 | 60.7 |

**Figure S28.** Dihedral angles of the meso substituent with the 12-atom BODIPY core for BODIPY **2**, **6a**, **6b**, **4**, **7**, and **8**: the purple and green plane corresponds to the 12-atom BODIPY and the meso substituent, respectively.

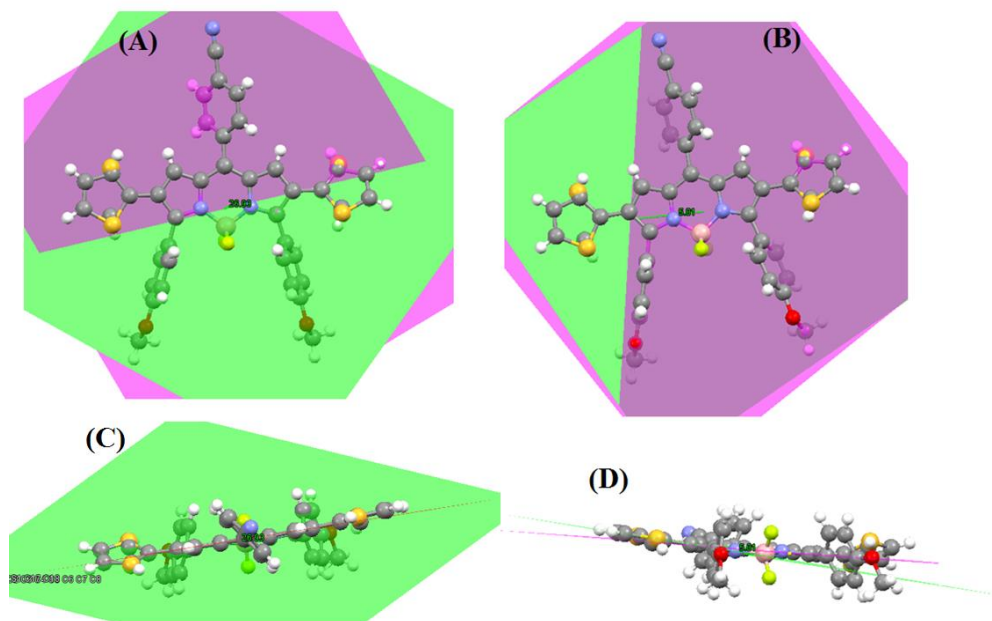

| Cpds     | Dihedral angle-2 position (°) | Dihedral angle-6position (°) |
|----------|-------------------------------|------------------------------|
| <b>7</b> | 26.9                          | 5.0                          |

**Figure S29.** Dihedral angles of the 2,6 substituents with the 12-atom BODIPY core for BODIPY **7**: (A, B) is the front view and (C,D) is the side view. The purple and green plane corresponds to the 12-atom BODIPY and the 2,6 substituents, respectively.

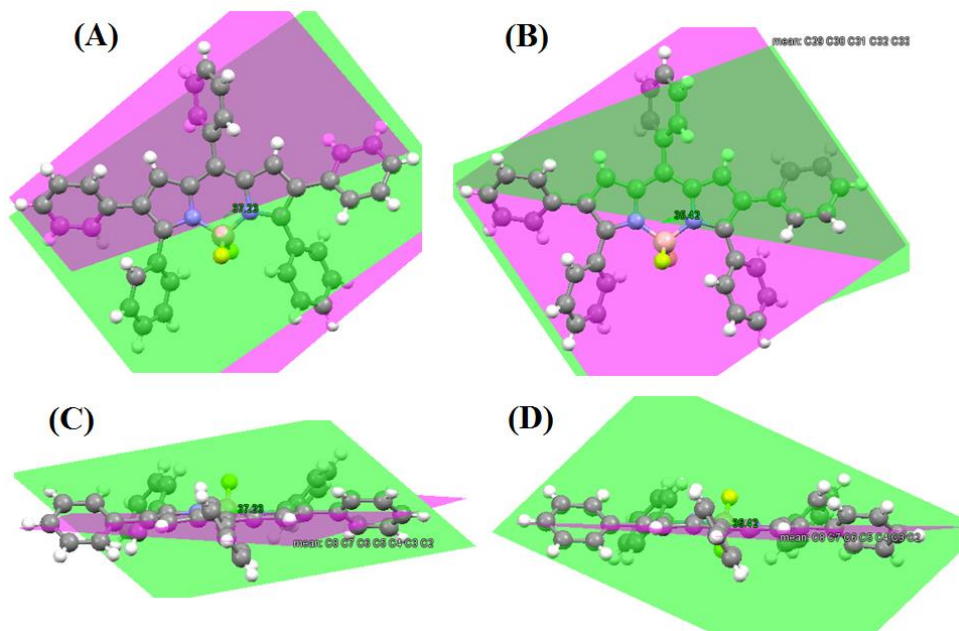

| Cpds     | Dihedral angle-2 position (°) | Dihedral angle-6position (°) |
|----------|-------------------------------|------------------------------|
| <b>4</b> | 37.2                          | 35.4                         |

**Figure S30.** Dihedral angles of the 2,6 substituents with the 12-atom BODIPY core for BODIPY **4**: (A, B) is the front view and (C,D) is the side view. The purple and green plane corresponds to the 12-atom BODIPY and the 2,6 substituents, respectively.

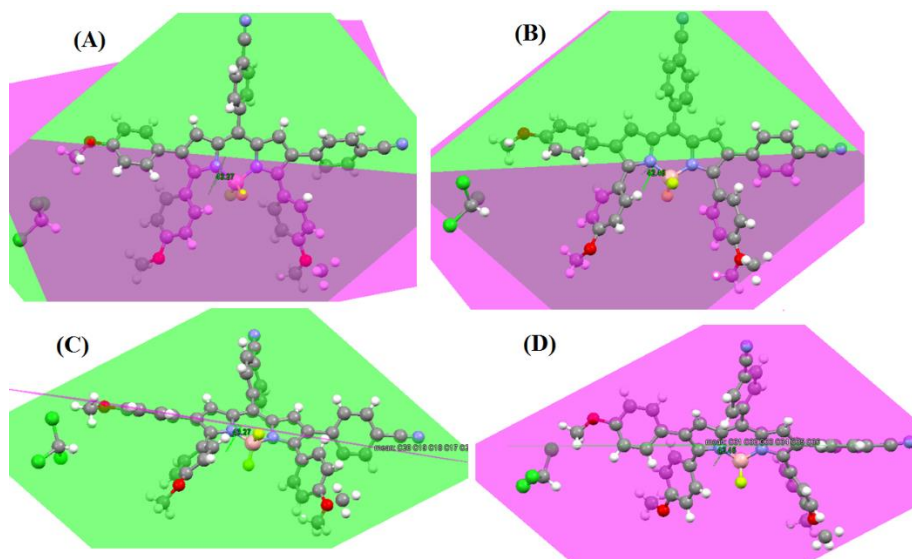

| Cpds     | Dihedral angle-2 position ( $^{\circ}$ ) | Dihedral angle-6position ( $^{\circ}$ ) |
|----------|------------------------------------------|-----------------------------------------|
| <b>8</b> | 43.3                                     | 42.5                                    |

**Figure S31.** Dihedral angles of the 2,6 substituents with the 12-atom BODIPY core for BODIPY **8**: (A, B) is the front view and (C,D) is the side view. The purple and green plane corresponds to the 12-atom BODIPY and the 2,6 substituents, respectively.

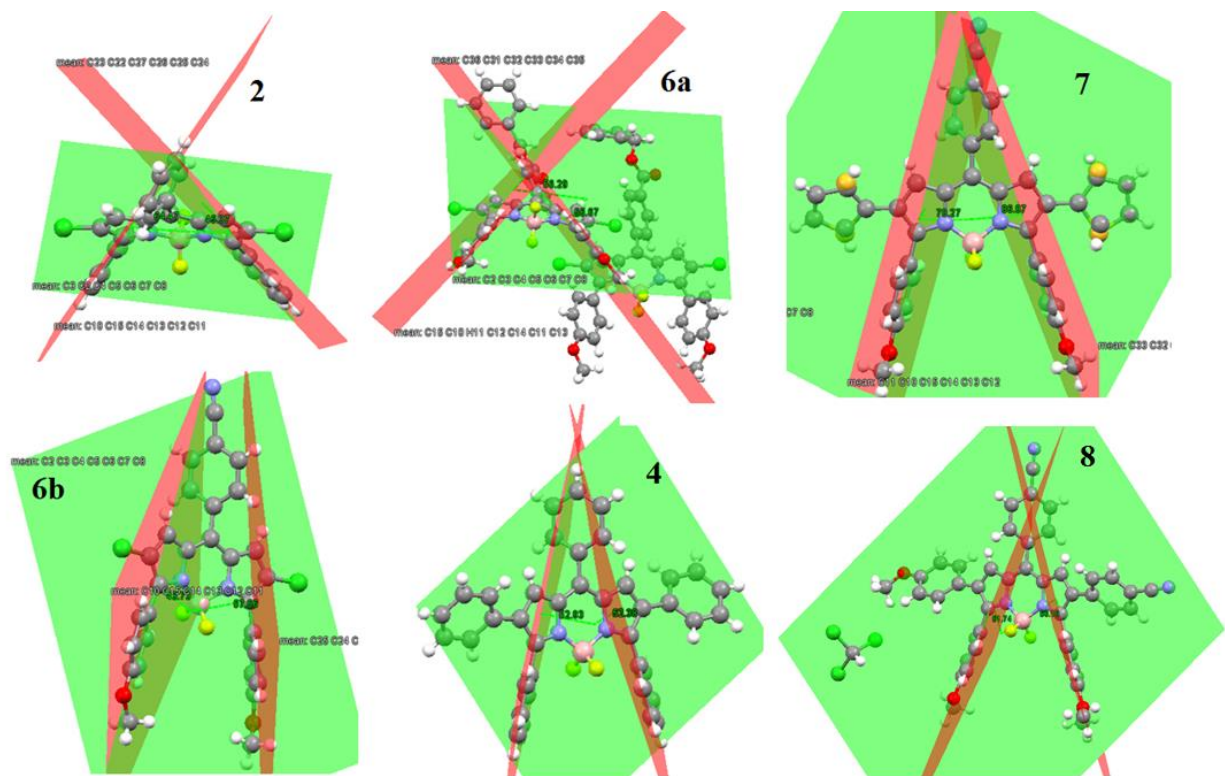

| Cpds                          | 2    | 6a   | 6b   | 4    | 7    | 8    |
|-------------------------------|------|------|------|------|------|------|
| Dihedral angle-3 position (°) | 64.5 | 56.3 | 43.7 | 52.9 | 70.3 | 51.7 |
| Dihedral angle-5 position (°) | 45.4 | 56.7 | 57.6 | 52.4 | 86.1 | 56.1 |

**Figure S32.** Dihedral angles of the 3,5 substituents with the 12-atom BODIPY core for BODIPY **2**, **6a**, **6b**, **4**, **7**, and **8**: the green and red plane corresponds to the 12-atom BODIPY and the 2,6 substituents, respectively.

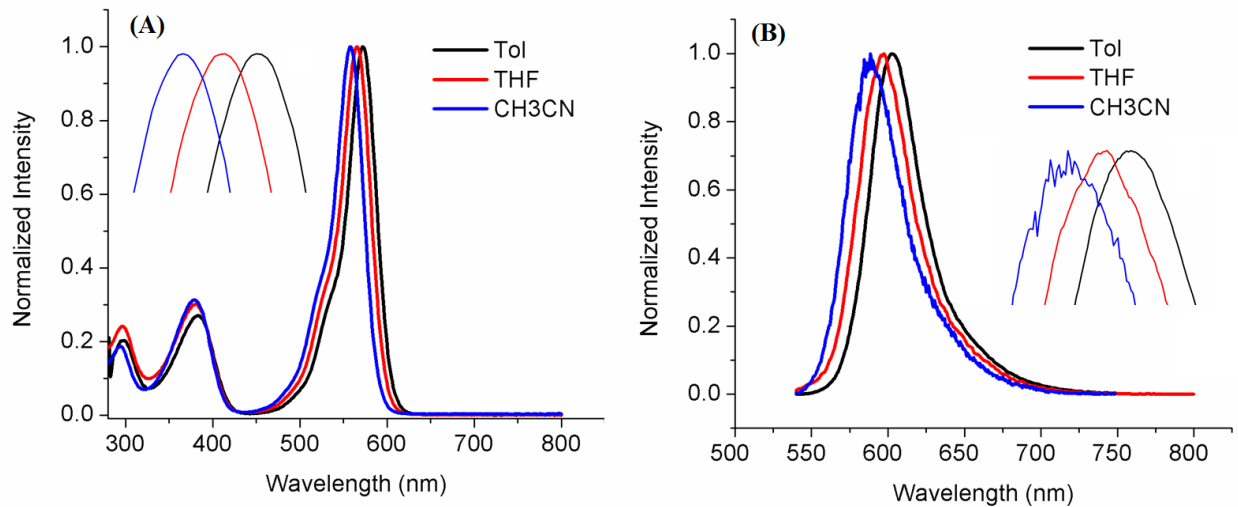

**Figure S33.** Absorbance (A) and fluorescence (B) spectra of BODIPY **2** in toluene, tetrahydrofuran and acetonitrile.

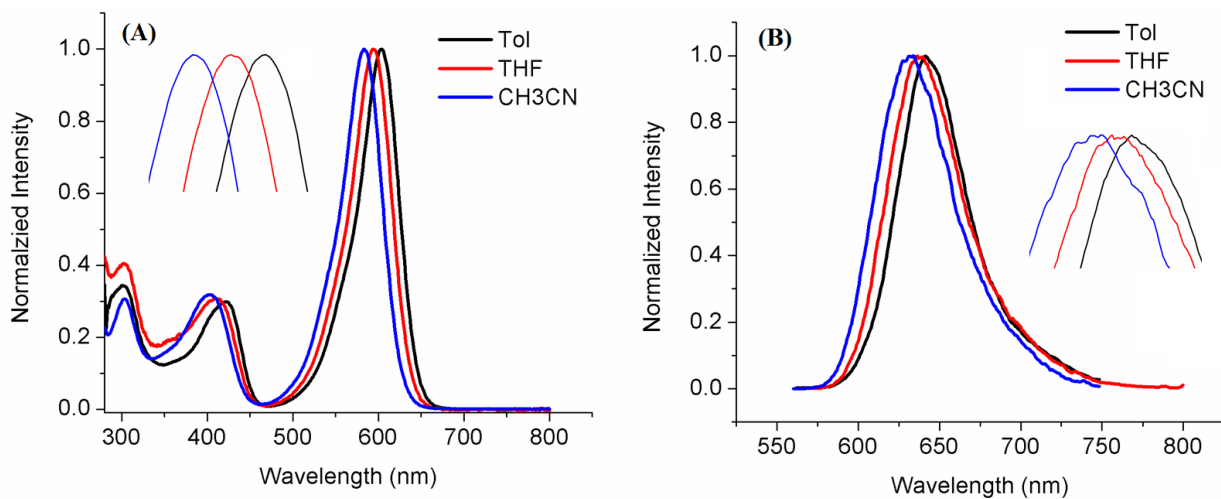

**Figure S34.** Absorbance (A) and fluorescence (B) spectra of BODIPY **6a** in toluene, tetrahydrofuran and acetonitrile.

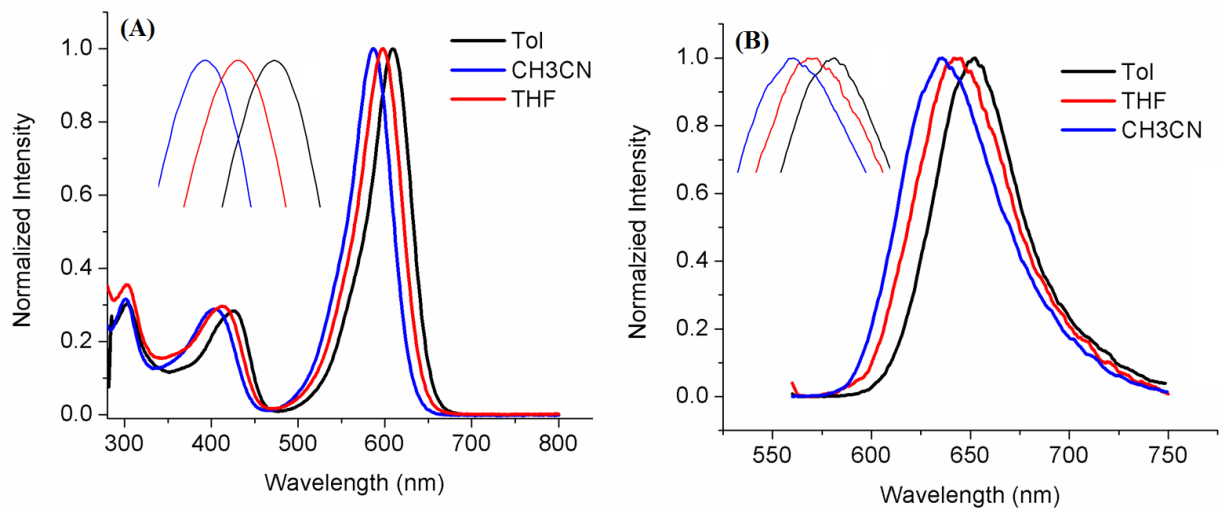

**Figure S35.** Absorbance (A) and fluorescence (B) spectra of BODIPY **6b** in toluene, tetrahydrofuran and acetonitrile.

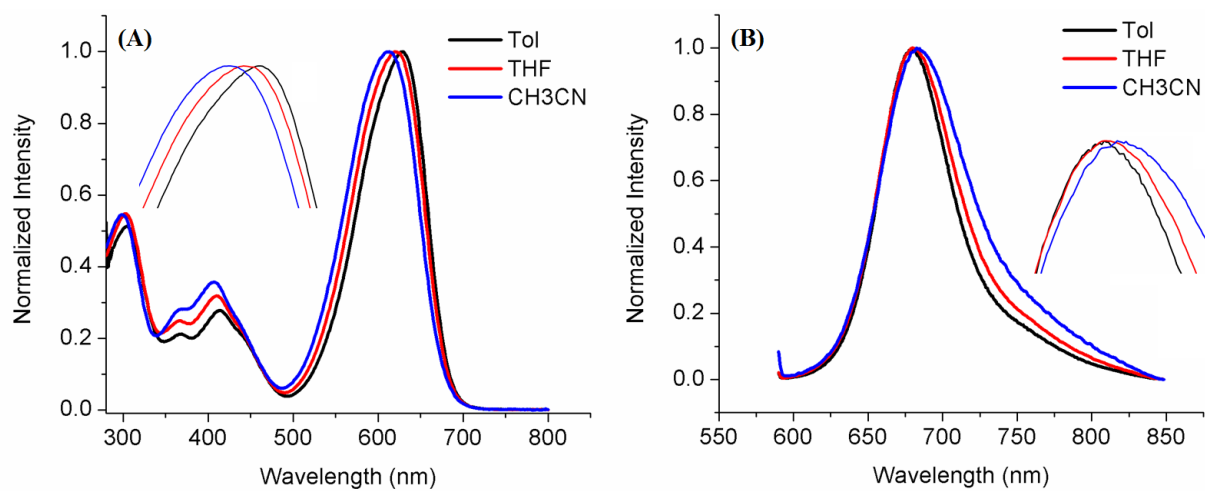

**Figure S36.** Absorbance (A) and fluorescence (B) spectra of BODIPY **3** in toluene, tetrahydrofuran and acetonitrile.



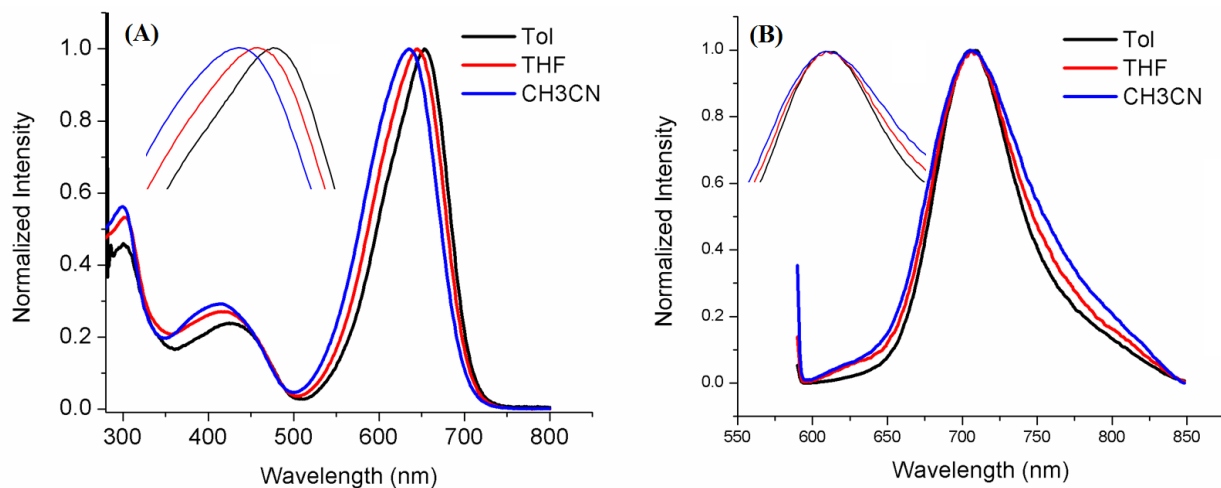

**Figure S37.** Absorbance (A) and fluorescence (B) spectra of BODIPY 7 in toluene, tetrahydrofuran and acetonitrile.

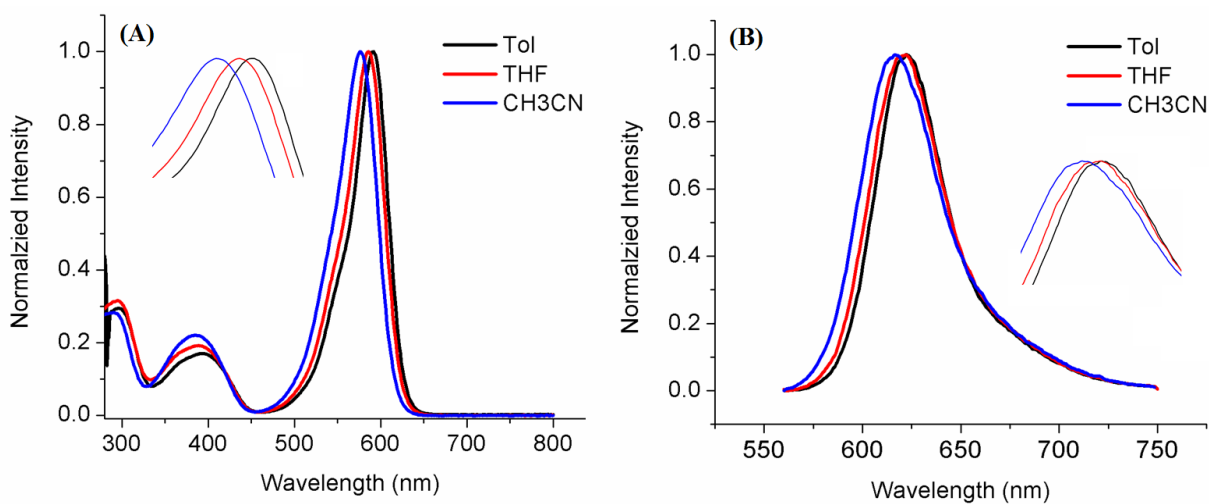

**Figure S38.** Absorbance (A) and fluorescence (B) spectra of BODIPY 4 in toluene, tetrahydrofuran and acetonitrile.

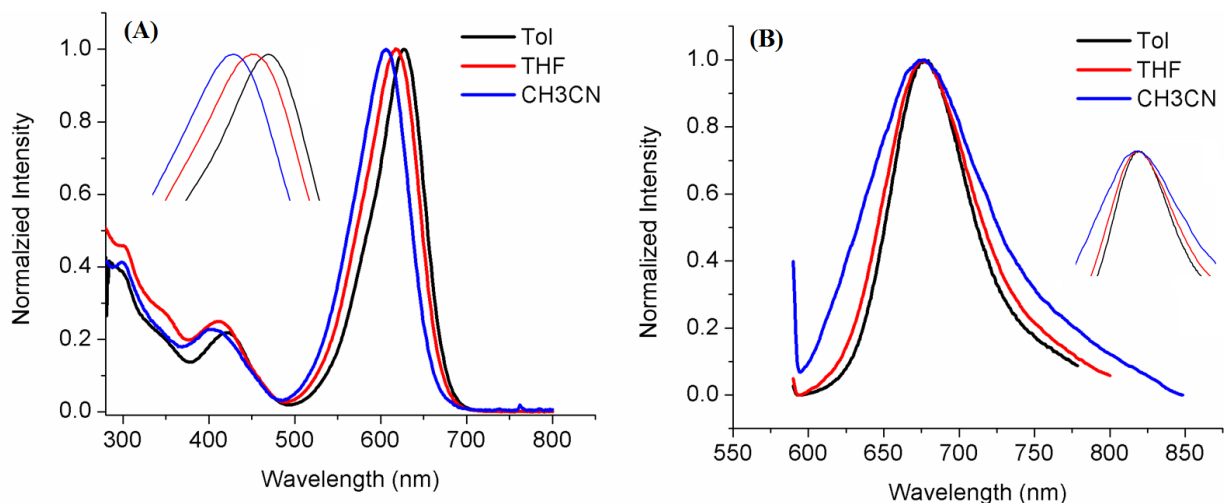

**Figure S39.** Absorbance (A) and fluorescence (B) spectra of BODIPY **8** in toluene, tetrahydrofuran and acetonitrile.

**Table S1.** Half-wave potentials (V vs. SCE) for the investigated BODIPYs in CH<sub>3</sub>CN and THF, 0.1 M TBAP.

| Solvent            | Cpd.#     | Oxidation       |                   | Reduction       |                    |                    | $\Delta(2-1)$ (Volt) | H-L Gap <sup>b</sup> |
|--------------------|-----------|-----------------|-------------------|-----------------|--------------------|--------------------|----------------------|----------------------|
|                    |           | 2 <sup>nd</sup> | 1 <sup>st</sup>   | 1 <sup>st</sup> | 2 <sup>nd</sup>    | 3 <sup>rd</sup>    |                      |                      |
| CH <sub>3</sub> CN | <b>2</b>  |                 | 1.42 <sup>a</sup> | -0.55           | -1.54 <sup>a</sup> |                    | 0.99                 |                      |
|                    | <b>4</b>  |                 | 1.28 <sup>a</sup> | -0.72           | -1.68 <sup>a</sup> |                    | 0.96                 |                      |
|                    | <b>3</b>  |                 | 1.16 <sup>a</sup> | -0.67           | -1.66 <sup>a</sup> |                    | 0.99                 |                      |
|                    | <b>6a</b> |                 | 1.32 <sup>a</sup> | -0.53           | -1.22              |                    | 0.71                 |                      |
|                    | <b>6b</b> | 1.60            | 1.31              | -0.48           | -1.20              |                    | 0.72                 | 1.79                 |
|                    | <b>8</b>  | 1.41            | 1.16              | -0.62           | -1.28              | -2.05              | 0.66                 | 1.78                 |
|                    | <b>7</b>  |                 | 1.11 <sup>a</sup> | -0.59           | -1.27              |                    | 0.68                 |                      |
| THF                | <b>2</b>  |                 | N/A               | -0.55           | -1.56 <sup>a</sup> |                    | 0.99                 |                      |
|                    | <b>4</b>  |                 | 1.43              | -0.74           | -1.68 <sup>a</sup> |                    | 0.94                 | 2.17                 |
|                    | <b>3</b>  |                 | 1.34 <sup>a</sup> | -0.69           | -1.64 <sup>a</sup> |                    | 0.95                 |                      |
|                    | <b>6a</b> |                 | 1.56 <sup>a</sup> | -0.53           | -1.20              |                    | 0.67                 |                      |
|                    | <b>6b</b> |                 | 1.56 <sup>a</sup> | -0.49           | -1.16              |                    | 0.67                 |                      |
|                    | <b>8</b>  |                 | 1.25              | -0.84           | -1.26              | -2.60 <sup>a</sup> | 0.42                 | 2.09                 |
|                    | <b>7</b>  |                 | 1.30 <sup>a</sup> | -0.61           | -1.23              |                    | 0.62                 |                      |

<sup>a</sup>Peak potential,  $E_p$  at scan rate of 0.1 V/s; <sup>b</sup>HOMO - LUMO Gap calculated as  $|E_{1/2}(1^{st} \text{ Ox}) - E_{1/2}(1^{st} \text{ Red})|$  for processes with reversible first oxidation and first reduction.

**Table S2.** The DFT calculated atom coordinates and their absolute energies for BODIPYs

BODIPY 2: HF = -2293.7581247 a.u.

|    |          |          |          |
|----|----------|----------|----------|
| C  | -1.16031 | 1.423793 | 0.088923 |
| C  | 0.085864 | 2.070975 | 0.094194 |
| C  | 1.273671 | 1.321284 | 0.070052 |
| C  | -3.33012 | 0.904537 | -0.04917 |
| C  | -2.57491 | -0.3056  | -0.01134 |
| C  | 3.379547 | 0.623832 | -0.2071  |
| C  | 2.537426 | -0.51922 | -0.06359 |
| B  | -0.03729 | -0.93057 | 0.315303 |
| F  | -0.0706  | -1.34354 | 1.653493 |
| F  | -0.07093 | -1.98056 | -0.56557 |
| N  | -1.26275 | 0.033796 | 0.076197 |
| N  | 1.265381 | -0.07108 | 0.10041  |
| Cl | 5.106388 | 0.606262 | -0.38997 |
| Cl | -5.0613  | 1.02592  | -0.10406 |
| C  | 2.95169  | -1.93128 | -0.06814 |
| C  | 4.27036  | -3.71243 | -1.06403 |
| H  | 4.945156 | -4.05366 | -1.84333 |
| C  | 3.836505 | -4.59522 | -0.0739  |
| H  | 4.178289 | -5.62614 | -0.07503 |
| C  | 2.515533 | -2.8286  | 0.922161 |
| H  | 1.828433 | -2.48838 | 1.686425 |
| C  | -3.10879 | -1.67767 | -0.04914 |
| C  | -3.2836  | -3.92522 | 0.843777 |
| H  | -2.98081 | -4.66694 | 1.576777 |
| C  | -4.22608 | -4.25109 | -0.13282 |
| H  | -4.65719 | -5.24749 | -0.16412 |
| C  | -4.06373 | -2.0121  | -1.02552 |
| H  | -4.36149 | -1.27258 | -1.76057 |
| C  | 3.838272 | -2.38872 | -1.05886 |
| H  | 4.172354 | -1.71036 | -1.83582 |
| C  | 2.960059 | -4.14794 | 0.916137 |
| H  | 2.618886 | -4.82953 | 1.689548 |
| C  | -4.61142 | -3.29156 | -1.07014 |
| H  | -5.33838 | -3.53811 | -1.83813 |
| C  | -2.72362 | -2.65107 | 0.888588 |
| H  | -1.98809 | -2.40433 | 1.643237 |
| C  | 0.157871 | 3.553982 | 0.082943 |
| C  | -0.40666 | 5.694581 | -0.91781 |
| H  | -0.8996  | 6.259469 | -1.70321 |
| C  | 0.308029 | 6.358803 | 0.080483 |
| H  | 0.365397 | 7.443066 | 0.079664 |

|   |          |          |          |
|---|----------|----------|----------|
| C | 0.882024 | 4.231975 | 1.078426 |
| H | 1.370962 | 3.662307 | 1.86203  |
| C | 0.950253 | 5.624081 | 1.078564 |
| H | 1.503148 | 6.134348 | 1.861397 |
| C | -0.48623 | 4.302935 | -0.91637 |
| H | -1.02635 | 3.788151 | -1.7041  |
| C | 2.60503  | 1.762603 | -0.12102 |
| H | 2.935975 | 2.78602  | -0.20137 |
| C | -2.46327 | 1.974755 | 0.03437  |
| H | -2.71935 | 3.022036 | 0.059208 |

BODIPY **6a**: HF = -2981.751587 a.u.

|    |          |          |          |
|----|----------|----------|----------|
| C  | -1.12214 | 1.617352 | 0.340587 |
| C  | 0.129745 | 2.25221  | 0.336976 |
| C  | 1.311056 | 1.494242 | 0.304415 |
| C  | -3.29749 | 1.120398 | 0.215051 |
| C  | -2.55609 | -0.10037 | 0.249208 |
| C  | 3.408355 | 0.78192  | 0.004281 |
| C  | 2.559333 | -0.35834 | 0.148313 |
| B  | -0.01765 | -0.74512 | 0.546607 |
| F  | -0.03984 | -1.1709  | 1.88271  |
| F  | -0.06983 | -1.79028 | -0.34085 |
| N  | -1.23829 | 0.228553 | 0.329143 |
| N  | 1.291211 | 0.101789 | 0.325942 |
| Cl | 5.135114 | 0.75781  | -0.18704 |
| Cl | -5.02831 | 1.26699  | 0.179415 |
| C  | 2.962029 | -1.76855 | 0.130922 |
| C  | 4.30037  | -3.54656 | -0.8703  |
| H  | 4.991968 | -3.85993 | -1.64257 |
| C  | 3.827309 | -4.44966 | 0.08971  |
| C  | 2.490706 | -2.69445 | 1.085086 |
| H  | 1.786267 | -2.37198 | 1.840859 |
| C  | -3.10344 | -1.46183 | 0.214225 |
| C  | -3.25434 | -3.73018 | 1.069542 |
| H  | -2.94202 | -4.50542 | 1.760965 |
| C  | -4.2525  | -4.03338 | 0.130459 |
| C  | -4.10758 | -1.77737 | -0.7144  |
| H  | -4.43862 | -1.02664 | -1.42304 |
| C  | 3.873156 | -2.22114 | -0.83605 |
| H  | 4.239736 | -1.53544 | -1.5913  |
| C  | 2.920315 | -4.00991 | 1.066695 |
| H  | 2.567314 | -4.72358 | 1.803339 |
| C  | -4.67571 | -3.04803 | -0.77001 |

|   |          |          |          |
|---|----------|----------|----------|
| H | -5.43648 | -3.25569 | -1.51241 |
| C | -2.68554 | -2.46885 | 1.10875  |
| H | -1.91436 | -2.25157 | 1.836043 |
| C | 0.213499 | 3.73517  | 0.318411 |
| C | -0.33462 | 5.871944 | -0.70211 |
| H | -0.81793 | 6.442299 | -1.48663 |
| C | 0.386219 | 6.540601 | 0.295455 |
| C | 0.940946 | 4.414821 | 1.311504 |
| H | 1.424164 | 3.847753 | 2.100251 |
| C | 1.021645 | 5.802678 | 1.301826 |
| H | 1.571145 | 6.336405 | 2.069517 |
| C | -0.42181 | 4.483025 | -0.68769 |
| H | -0.96507 | 3.967873 | -1.47272 |
| C | 2.644738 | 1.925722 | 0.104881 |
| H | 2.9853   | 2.946625 | 0.032392 |
| C | -2.41982 | 2.181226 | 0.292171 |
| H | -2.66666 | 3.230818 | 0.318822 |
| O | -4.74236 | -5.30228 | 0.176081 |
| C | -5.75442 | -5.66956 | -0.75034 |
| H | -5.40265 | -5.58702 | -1.78628 |
| H | -5.99485 | -6.71131 | -0.53454 |
| H | -6.65643 | -5.05729 | -0.62684 |
| O | 4.183227 | -5.76116 | 0.16103  |
| C | 5.096243 | -6.26795 | -0.80182 |
| H | 5.236941 | -7.32127 | -0.55618 |
| H | 4.696702 | -6.1849  | -1.82024 |
| H | 6.063669 | -5.75289 | -0.75156 |
| C | 0.512529 | 8.027826 | 0.333017 |
| O | 1.134967 | 8.638895 | 1.180027 |
| O | -0.14503 | 8.623308 | -0.68478 |
| C | -0.06191 | 10.07496 | -0.7189  |
| H | -0.48449 | 10.46976 | 0.209024 |
| H | 0.994469 | 10.35677 | -0.75009 |
| C | -0.81313 | 10.55601 | -1.92908 |
| C | -2.12762 | 11.02152 | -1.81349 |
| C | -0.21039 | 10.53138 | -3.19332 |
| C | -2.8287  | 11.45601 | -2.93898 |
| H | -2.60293 | 11.04547 | -0.83625 |
| C | -0.90894 | 10.96155 | -4.32025 |
| H | 0.811242 | 10.17354 | -3.29196 |
| C | -2.2203  | 11.42567 | -4.19435 |
| H | -3.8471  | 11.81862 | -2.83527 |
| H | -0.43018 | 10.93984 | -5.29481 |
| H | -2.76367 | 11.76566 | -5.07108 |

BODIPY **6b**: HF = -2615.0506235 a.u.

|    |          |          |          |
|----|----------|----------|----------|
| C  | -1.15507 | 1.501302 | 0.162285 |
| C  | 0.090893 | 2.145239 | 0.12947  |
| C  | 1.280477 | 1.400881 | 0.144904 |
| C  | -3.32507 | 0.97747  | 0.051567 |
| C  | -2.57191 | -0.23303 | 0.161073 |
| C  | 3.387239 | 0.696561 | -0.10379 |
| C  | 2.549276 | -0.44386 | 0.10103  |
| B  | -0.02747 | -0.83373 | 0.508765 |
| F  | -0.05219 | -1.18073 | 1.867178 |
| F  | -0.06518 | -1.92741 | -0.31791 |
| N  | -1.25777 | 0.113259 | 0.230369 |
| N  | 1.27515  | 0.012108 | 0.245793 |
| Cl | 5.114598 | 0.683003 | -0.28304 |
| Cl | -5.0559  | 1.106254 | -0.00186 |
| C  | 2.967939 | -1.84709 | 0.168032 |
| C  | 4.339442 | -3.66262 | -0.71409 |
| H  | 5.045103 | -4.01086 | -1.4583  |
| C  | 3.862259 | -4.51651 | 0.288332 |
| C  | 2.493814 | -2.72376 | 1.166714 |
| H  | 1.777133 | -2.36753 | 1.895265 |
| C  | -3.1064  | -1.5985  | 0.202745 |
| C  | -3.23316 | -3.81767 | 1.182072 |
| H  | -2.9125  | -4.55046 | 1.914701 |
| C  | -4.22999 | -4.18217 | 0.263284 |
| C  | -4.11022 | -1.97443 | -0.70414 |
| H  | -4.45043 | -1.26771 | -1.45246 |
| C  | 3.897788 | -2.34258 | -0.75986 |
| H  | 4.267355 | -1.69665 | -1.54789 |
| C  | 2.937766 | -4.03286 | 1.227772 |
| H  | 2.582875 | -4.7082  | 1.998815 |
| C  | -4.6656  | -3.25153 | -0.68841 |
| H  | -5.42644 | -3.50709 | -1.41571 |
| C  | -2.67682 | -2.55093 | 1.150482 |
| H  | -1.90836 | -2.2865  | 1.864821 |
| C  | 0.160336 | 3.62624  | 0.030482 |
| C  | -0.3974  | 5.697474 | -1.11202 |
| H  | -0.87621 | 6.219347 | -1.93336 |
| C  | 0.303962 | 6.427696 | -0.1388  |
| C  | 0.865669 | 4.365788 | 0.99536  |
| H  | 1.344431 | 3.84702  | 1.818912 |
| C  | 0.935772 | 5.752045 | 0.918054 |
| H  | 1.47271  | 6.316961 | 1.672211 |
| C  | -0.46816 | 4.311845 | -1.02294 |

|   |          |          |          |
|---|----------|----------|----------|
| H | -0.99606 | 3.750236 | -1.7859  |
| C | 2.610807 | 1.835242 | -0.07204 |
| H | 2.942047 | 2.853493 | -0.20252 |
| C | -2.45805 | 2.049003 | 0.073342 |
| H | -2.71647 | 3.095693 | 0.039021 |
| C | 0.376522 | 7.857297 | -0.22529 |
| N | 0.435386 | 9.016844 | -0.29594 |
| O | -4.70559 | -5.45097 | 0.379342 |
| C | -5.71601 | -5.88066 | -0.52238 |
| H | -5.3686  | -5.84877 | -1.56247 |
| H | -5.94129 | -6.91248 | -0.25031 |
| H | -6.62568 | -5.27483 | -0.42749 |
| O | 4.229324 | -5.81754 | 0.436402 |
| C | 5.160065 | -6.36813 | -0.48526 |
| H | 5.305203 | -7.40528 | -0.18082 |
| H | 4.773879 | -6.34343 | -1.51176 |
| H | 6.122433 | -5.84274 | -0.44937 |

BODIPY 3: HF = -2478.2095903 a.u.

|   |          |          |          |
|---|----------|----------|----------|
| C | -1.21918 | 1.127465 | 0.20941  |
| C | -0.00099 | 1.825507 | 0.246337 |
| C | 1.218458 | 1.127839 | 0.231493 |
| C | -3.39517 | 0.513299 | 0.065229 |
| C | -2.55576 | -0.65166 | 0.062876 |
| C | 3.390773 | 0.517407 | 0.026224 |
| C | 2.558317 | -0.65013 | 0.101395 |
| B | -0.00102 | -1.18665 | 0.379589 |
| F | -0.03862 | -1.66945 | 1.695025 |
| F | 0.024691 | -2.195   | -0.55122 |
| N | -1.2614  | -0.26569 | 0.165047 |
| N | 1.26611  | -0.2651  | 0.231931 |
| C | 2.998539 | -2.05683 | 0.023117 |
| C | 4.285523 | -3.77186 | -1.11901 |
| H | 4.921424 | -4.06914 | -1.94762 |
| C | 3.918747 | -4.70323 | -0.14553 |
| H | 4.27355  | -5.72778 | -0.21043 |
| C | 2.627655 | -3.00188 | 0.993895 |
| H | 1.967425 | -2.70648 | 1.799831 |
| C | -2.99842 | -2.05482 | -0.06751 |
| C | -3.09928 | -4.34783 | 0.716108 |
| H | -2.80881 | -5.10231 | 1.441205 |
| C | -3.93146 | -4.68731 | -0.35139 |
| H | -4.29066 | -5.70651 | -0.46083 |
| C | -3.84223 | -2.40386 | -1.13646 |

|   |          |          |          |
|---|----------|----------|----------|
| H | -4.12998 | -1.64696 | -1.85836 |
| C | 3.836494 | -2.45672 | -1.0323  |
| H | 4.12362  | -1.73458 | -1.78903 |
| C | 3.090908 | -4.31334 | 0.908091 |
| H | 2.799228 | -5.03372 | 1.666614 |
| C | -4.29745 | -3.71176 | -1.2808  |
| H | -4.93784 | -3.96856 | -2.11945 |
| C | -2.62963 | -3.04346 | 0.85932  |
| H | -1.96789 | -2.7867  | 1.67687  |
| C | 0.005656 | 3.310414 | 0.256896 |
| C | -0.64677 | 5.437091 | -0.72089 |
| H | -1.15873 | 5.989428 | -1.50315 |
| C | 0.028525 | 6.119795 | 0.292211 |
| H | 0.036968 | 7.205537 | 0.305865 |
| C | 0.688531 | 4.007642 | 1.268045 |
| H | 1.195781 | 3.450009 | 2.0486   |
| C | 0.694084 | 5.401318 | 1.286788 |
| H | 1.216547 | 5.925482 | 2.081376 |
| C | -0.66305 | 4.043421 | -0.738   |
| H | -1.1747  | 3.514826 | -1.53545 |
| C | 2.537523 | 1.614642 | 0.101164 |
| H | 2.822447 | 2.655818 | 0.075605 |
| C | -2.54514 | 1.611032 | 0.166578 |
| H | -2.8381  | 2.648002 | 0.234964 |
| C | 4.846414 | 0.566104 | -0.07051 |
| C | 5.797017 | -0.2614  | 0.482757 |
| S | 5.624833 | 1.868922 | -0.95557 |
| C | 7.135178 | 0.143612 | 0.207565 |
| H | 5.540787 | -1.12642 | 1.081251 |
| C | 7.204775 | 1.278534 | -0.55195 |
| H | 8.009261 | -0.38683 | 0.567821 |
| H | 8.083675 | 1.80079  | -0.90298 |
| C | -4.85314 | 0.557486 | 0.022948 |
| C | -5.78113 | -0.30808 | 0.55623  |
| S | -5.66682 | 1.907099 | -0.75379 |
| C | -7.12936 | 0.105019 | 0.351802 |
| H | -5.50147 | -1.20613 | 1.092207 |
| C | -7.22974 | 1.283596 | -0.33429 |
| H | -7.98847 | -0.45158 | 0.708596 |
| H | -8.12226 | 1.821139 | -0.62216 |



BODIPY 7: HF = -2799.5020354 a.u.

|   |          |          |          |
|---|----------|----------|----------|
| C | -1.21793 | 1.432487 | 0.232958 |
| C | 0.001656 | 2.126629 | 0.231225 |
| C | 1.221546 | 1.432406 | 0.246765 |
| C | -3.39531 | 0.81838  | 0.123435 |
| C | 2.55961  | 0.351119 | 0.179369 |
| C | 3.393277 | 0.816202 | 0.060023 |
| C | 2.563227 | -0.35121 | 0.191942 |
| B | 0.000902 | -0.86853 | 0.509332 |
| F | -0.02806 | -1.28766 | 1.848166 |
| F | 0.019945 | -1.92149 | -0.37123 |
| N | -1.26281 | 0.039251 | 0.261287 |
| N | 1.269826 | 0.041134 | 0.311139 |
| C | 3.007868 | -1.75319 | 0.174147 |
| C | 4.352915 | -3.49923 | -0.87278 |
| H | 5.024417 | -3.79704 | -1.66873 |
| C | 3.934772 | -4.41283 | 0.10329  |
| C | 2.591891 | -2.68827 | 1.143224 |
| H | 1.897857 | -2.38313 | 1.916031 |
| C | -3.0087  | -1.75151 | 0.119321 |
| C | -3.05599 | -4.02753 | 0.966673 |
| H | -2.7383  | -4.7805  | 1.679978 |
| C | -3.9525  | -4.40119 | -0.04599 |
| C | -3.91325 | -2.13731 | -0.88192 |
| H | -4.24908 | -1.4059  | -1.60896 |
| C | 3.895569 | -2.18425 | -0.82352 |
| H | 4.223924 | -1.48537 | -1.58498 |
| C | 3.053551 | -3.99393 | 1.111743 |
| H | 2.741086 | -4.71599 | 1.858525 |
| C | -4.37906 | -3.44673 | -0.97828 |
| H | -5.06369 | -3.70836 | -1.77571 |
| C | -2.586   | -2.72663 | 1.044831 |
| H | -1.88272 | -2.45577 | 1.821713 |
| C | 0.008549 | 3.610857 | 0.163459 |
| C | -0.63905 | 5.679275 | -0.9368  |
| H | 1.140867 | 6.196379 | 1.747394 |
| C | 0.030207 | 6.419586 | 0.051378 |
| C | 0.680272 | 4.361232 | 1.143937 |
| H | 1.181109 | 3.847058 | 1.957077 |
| C | 0.690471 | 5.750426 | 1.094896 |
| H | 1.202435 | 6.322602 | 1.860899 |
| C | -0.64946 | 4.2905   | -0.87581 |
| H | 1.154463 | 3.721758 | 1.648791 |
| C | 2.540147 | 1.913924 | 0.08783  |

|   |          |          |          |
|---|----------|----------|----------|
| H | 2.82739  | 2.952355 | 0.015581 |
| C | -2.54337 | 1.916722 | 0.165376 |
| H | -2.83694 | 2.955758 | 0.1837   |
| C | 4.849127 | 0.868067 | 0.036882 |
| C | 5.804315 | 0.091628 | 0.579116 |
| S | 5.620353 | 2.112605 | -1.00798 |
| C | 7.140069 | 0.489901 | 0.283451 |
| H | 5.552409 | -0.73065 | 1.236828 |
| C | 7.2033   | 1.568401 | -0.55505 |
| H | 8.017099 | -0.00367 | 0.686377 |
| H | 8.079207 | 2.073564 | -0.93719 |
| C | -4.85359 | 0.869903 | 0.089275 |
| C | -5.78292 | 0.058385 | 0.699776 |
| S | -5.66415 | 2.161901 | -0.78261 |
| C | -7.12963 | 0.467489 | 0.478331 |
| H | -5.50419 | -0.79684 | 1.302227 |
| C | -7.22748 | 1.588879 | -0.29837 |
| H | -7.9895  | -0.04971 | 0.88851  |
| H | -8.11843 | 2.111028 | -0.6177  |
| O | 4.323357 | -5.71656 | 0.160957 |
| O | -4.34698 | -5.70446 | -0.03597 |
| C | -5.24043 | -6.14829 | -1.04661 |
| H | -4.8097  | -6.02721 | -2.04834 |
| H | -5.4086  | -7.20861 | -0.85387 |
| H | -6.19942 | -5.61688 | -1.00104 |
| C | 5.200614 | -6.20576 | -0.84297 |
| H | 5.367024 | -7.25807 | -0.60917 |
| H | 4.756289 | -6.12376 | -1.84271 |
| H | 6.162328 | -5.67745 | -0.83257 |
| C | 0.040663 | 7.852397 | -0.00591 |
| N | 0.04915  | 9.014712 | -0.05271 |

**BODIPY 4:** HF = -1836.7043286 a.u.

|   |          |          |          |
|---|----------|----------|----------|
| C | -1.19127 | 1.37558  | 0.155742 |
| C | 0.040427 | 2.048522 | 0.188045 |
| C | 1.245351 | 1.328076 | 0.150875 |
| C | -3.38271 | 0.811432 | 0.028086 |
| C | -2.57003 | -0.37047 | 0.011465 |
| C | 3.404852 | 0.683719 | -0.09174 |
| C | 2.554196 | -0.46882 | -0.01638 |
| B | -0.01695 | -0.96096 | 0.280224 |
| F | -0.04646 | -1.46554 | 1.589879 |
| F | -0.023   | -1.95683 | -0.66537 |
| N | -1.26316 | -0.01517 | 0.09906  |

|   |          |          |          |
|---|----------|----------|----------|
| N | 1.267208 | -0.06459 | 0.132439 |
| C | 2.974471 | -1.87904 | -0.12696 |
| C | 4.284452 | -3.56955 | -1.28251 |
| H | 4.947777 | -3.84429 | -2.09729 |
| C | 3.872035 | -4.53048 | -0.35759 |
| H | 4.217574 | -5.55642 | -0.44623 |
| C | 2.559876 | -2.85424 | 0.795941 |
| H | 1.878364 | -2.57953 | 1.591149 |
| C | -3.05121 | -1.75891 | -0.13402 |
| C | -3.1637  | -4.07567 | 0.576969 |
| H | -2.84835 | -4.86165 | 1.256875 |
| C | -4.0712  | -4.3579  | -0.44508 |
| H | -4.46354 | -5.36365 | -0.56484 |
| C | -3.97184 | -2.05109 | -1.15631 |
| H | -4.28497 | -1.26351 | -1.83332 |
| C | 3.846492 | -2.25308 | -1.16476 |
| H | 4.168765 | -1.50918 | -1.88529 |
| C | 3.011191 | -4.16714 | 0.679194 |
| H | 2.685206 | -4.90991 | 1.401347 |
| C | -4.47049 | -3.34141 | -1.31461 |
| H | -5.17102 | -3.5521  | -2.11726 |
| C | -2.65164 | -2.7893  | 0.73367  |
| H | -1.93691 | -2.5778  | 1.518632 |
| C | 0.076951 | 3.533308 | 0.216136 |
| C | -0.53429 | 5.684437 | -0.73503 |
| H | -1.03672 | 6.256421 | -1.50941 |
| C | 0.157422 | 6.34146  | 0.283954 |
| H | 0.187996 | 7.426586 | 0.310315 |
| C | 0.776662 | 4.204692 | 1.233015 |
| H | 1.275228 | 3.627422 | 2.004845 |
| C | 0.810857 | 5.59777  | 1.268002 |
| H | 1.346124 | 6.101817 | 2.067104 |
| C | -0.57891 | 4.291544 | -0.76812 |
| H | 1.103309 | 3.782108 | 1.569816 |
| C | 2.572513 | 1.792338 | 0.006397 |
| H | 2.876247 | 2.828398 | -0.00641 |
| C | -2.50852 | 1.887381 | 0.126828 |
| H | -2.7788  | 2.929529 | 0.208614 |
| C | 4.876442 | 0.732454 | -0.20621 |
| C | 5.706691 | -0.1149  | 0.548122 |
| C | 5.481906 | 1.684175 | -1.04483 |
| C | 7.09368  | -0.0137  | 0.461415 |
| H | 5.259618 | -0.84692 | 1.212023 |
| C | 6.869727 | 1.786657 | -1.12762 |
| H | 4.854303 | 2.336304 | -1.64544 |

|   |          |          |          |
|---|----------|----------|----------|
| C | 7.681867 | 0.936555 | -0.37569 |
| H | 7.717125 | -0.67548 | 1.055773 |
| H | 7.316245 | 2.526831 | -1.78552 |
| H | 8.763212 | 1.013306 | -0.44126 |
| C | -4.8557  | 0.912357 | 0.005672 |
| C | -5.66999 | 0.058948 | 0.770517 |
| C | -5.47574 | 1.920793 | -0.75213 |
| C | -7.05515 | 0.209572 | 0.772045 |
| H | -5.21154 | -0.71631 | 1.374793 |
| C | -6.86145 | 2.07263  | -0.74687 |
| H | -4.8617  | 2.579264 | -1.35983 |
| C | -7.65764 | 1.215944 | 0.01441  |
| H | -7.66553 | -0.45782 | 1.373621 |
| H | -7.31922 | 2.856693 | -1.34333 |
| H | -8.73756 | 1.331005 | 0.017664 |

**BODIPY 8:** HF = -2364.7647973 a.u.

|   |          |          |          |
|---|----------|----------|----------|
| C | -1.25031 | 1.259546 | 0.248795 |
| C | -0.02955 | 1.959223 | 0.282719 |
| C | 1.186728 | 1.270918 | 0.344006 |
| C | -3.42087 | 0.636805 | 0.087517 |
| C | 2.587958 | 0.526428 | 0.182342 |
| C | 3.370788 | 0.670157 | 0.236098 |
| C | 2.540676 | -0.50278 | 0.345706 |
| B | -0.03299 | -1.03395 | 0.570456 |
| F | -0.10252 | -1.45759 | 1.907524 |
| F | 0.016143 | -2.08566 | -0.31099 |
| N | -1.29171 | -0.13153 | 0.288411 |
| N | 1.239858 | -0.12087 | 0.415887 |
| C | 3.002903 | -1.89742 | 0.34074  |
| C | 4.469507 | -3.59765 | -0.61791 |
| H | 5.215958 | -3.86553 | -1.35565 |
| C | 3.983301 | -4.54008 | 0.297375 |
| C | 2.52015  | -2.86241 | 1.248969 |
| H | 1.759726 | -2.58644 | 1.96801  |
| C | -3.03457 | -1.92787 | 0.11369  |
| C | -3.10902 | -4.20274 | 0.96294  |
| H | -2.80539 | -4.95703 | 1.680997 |
| C | -3.99867 | -4.57137 | -0.05809 |
| C | -3.9301  | -2.30966 | -0.8973  |
| H | -4.24928 | -1.57824 | -1.6323  |
| C | 3.985952 | -2.29218 | -0.58133 |
| H | 4.369182 | -1.57182 | -1.2954  |

|   |          |          |          |
|---|----------|----------|----------|
| C | 3.00744  | -4.15831 | 1.231277 |
| H | 2.644953 | -4.90145 | 1.933417 |
| C | -4.40707 | -3.61506 | -0.9964  |
| H | -5.08529 | -3.87231 | -1.80066 |
| C | -2.62999 | -2.90553 | 1.045155 |
| H | -1.93483 | -2.63879 | 1.830659 |
| C | -0.02625 | 3.443116 | 0.202688 |
| C | -0.62894 | 5.498315 | -0.94708 |
| H | -1.09449 | 6.005997 | -1.78488 |
| C | -0.0052  | 6.250675 | 0.061673 |
| C | 0.59864  | 4.205395 | 1.20447  |
| H | 1.063672 | 3.700882 | 2.044494 |
| C | 0.608375 | 5.594152 | 1.141048 |
| H | 1.08423  | 6.175688 | 1.923128 |
| C | -0.63972 | 4.110222 | -0.87136 |
| H | -1.10836 | 3.531492 | -1.65981 |
| C | 2.51255  | 1.757925 | 0.229347 |
| H | 2.79679  | 2.798022 | 0.169849 |
| C | -2.57156 | 1.73962  | 0.133837 |
| H | -2.86624 | 2.778548 | 0.135948 |
| C | 4.843785 | 0.747153 | 0.187878 |
| C | 5.659698 | -0.00835 | 1.053817 |
| C | 5.476721 | 1.637679 | -0.68942 |
| C | 7.039503 | 0.123434 | 1.0368   |
| H | 5.200953 | -0.69738 | 1.754707 |
| C | 6.86537  | 1.78194  | -0.71728 |
| H | 4.873718 | 2.22307  | -1.37773 |
| C | 7.65582  | 1.019961 | 0.150047 |
| H | 7.666736 | -0.45275 | 1.708894 |
| H | 7.312472 | 2.478334 | -1.41653 |
| C | -4.8913  | 0.707342 | 0.029356 |
| C | -5.70857 | -0.13681 | 0.80507  |
| C | -5.5154  | 1.680031 | -0.77371 |
| C | -7.0917  | -0.01858 | 0.77586  |
| H | -5.25116 | -0.88238 | 1.444887 |
| C | -6.89822 | 1.809583 | -0.80785 |
| H | -4.90343 | 2.330727 | -1.39039 |
| C | -7.70086 | 0.95647  | -0.03295 |
| H | -7.70896 | -0.67151 | 1.383651 |
| H | -7.36446 | 2.560979 | -1.43618 |
| C | 0.007602 | 7.682688 | -0.0124  |
| C | -9.12805 | 1.078229 | -0.06797 |
| N | -10.2873 | 1.175981 | -0.09823 |
| N | 0.019149 | 8.844245 | -0.07419 |
| O | -4.40408 | -5.87053 | -0.04928 |

|   |          |          |          |
|---|----------|----------|----------|
| O | 4.389989 | -5.83676 | 0.363101 |
| O | 9.017392 | 1.071949 | 0.211289 |
| C | 9.69579  | 1.970937 | -0.65262 |
| H | 10.75814 | 1.853595 | -0.4348  |
| H | 9.515873 | 1.731932 | -1.70855 |
| H | 9.402117 | 3.01167  | -0.46576 |
| C | 5.371765 | -6.28577 | -0.56028 |
| H | 5.540998 | -7.33824 | -0.32968 |
| H | 5.02304  | -6.19442 | -1.59641 |
| H | 6.313917 | -5.73497 | -0.44755 |
| C | -5.29764 | -6.30739 | -1.06362 |
| H | -4.8594  | -6.19529 | -2.06309 |
| H | -5.47961 | -7.36474 | -0.86768 |
| H | -6.25001 | -5.76397 | -1.02496 |

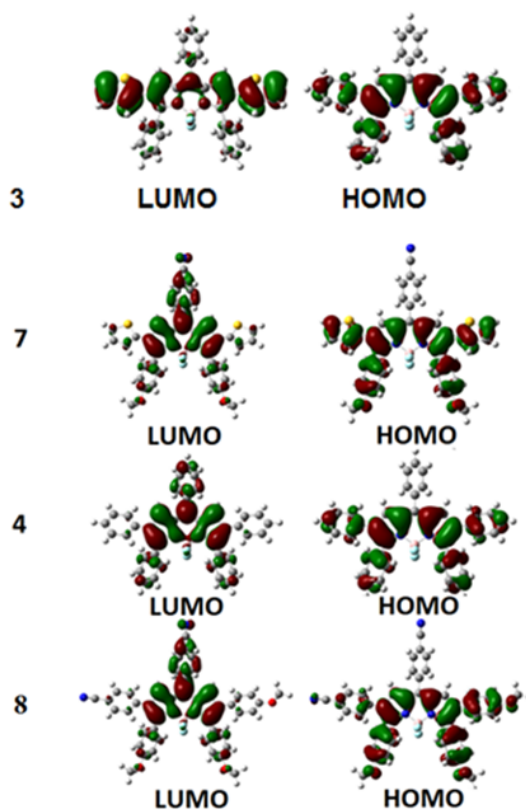

**Figure S40.** DFT calculated HOMO and LUMO orbitals for BODIPY **3**, **4**, **7** and **8** (B3LYP/6-31G(d)).

**Table S3.** DFT calculated molecular orbital energy levels for the BODIPYs.

| Cpd.#     | E <sub>HOMO</sub> (ev) | E <sub>LUMO</sub> (ev) | <sup>a</sup> ΔE (ev) |
|-----------|------------------------|------------------------|----------------------|
| <b>2</b>  | -5.83                  | -3.25                  | 2.61                 |
| <b>6a</b> | -5.32                  | -2.94                  | 2.37                 |
| <b>6b</b> | -5.45                  | -3.13                  | 2.32                 |
| <b>3</b>  | -5.18                  | -2.78                  | 2.40                 |
| <b>7</b>  | -5.13                  | -2.92                  | 2.21                 |
| <b>4</b>  | -5.26                  | -2.71                  | 2.55                 |
| <b>8</b>  | -5.29                  | -2.71                  | 2.27                 |

<sup>a</sup>ΔE = E<sub>LUMO</sub> - E<sub>HOMO</sub>

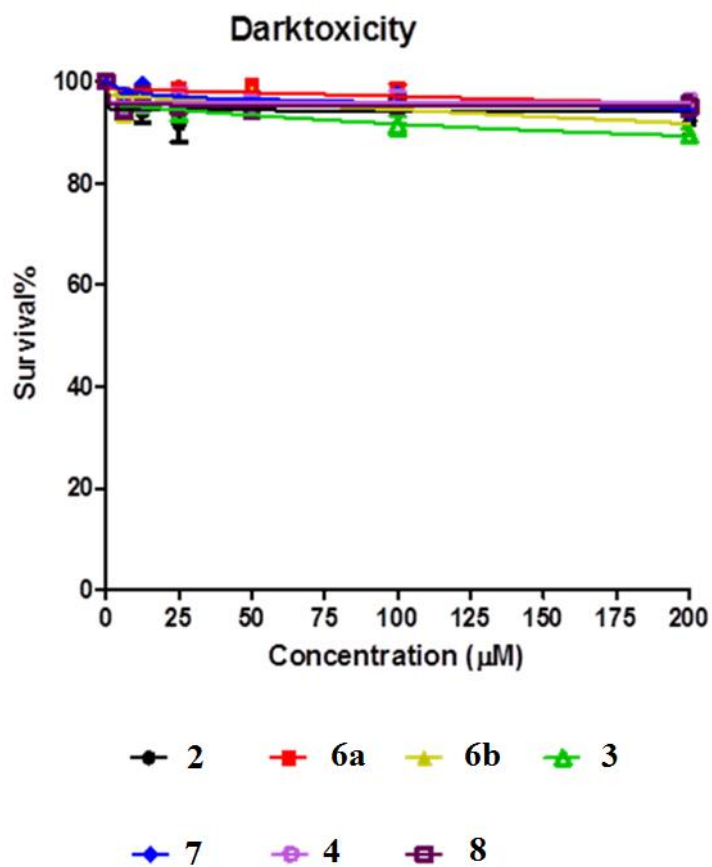

**Figure S41.** Concentration dependent dark toxicity of BODIPYs in HEp 2 cells.

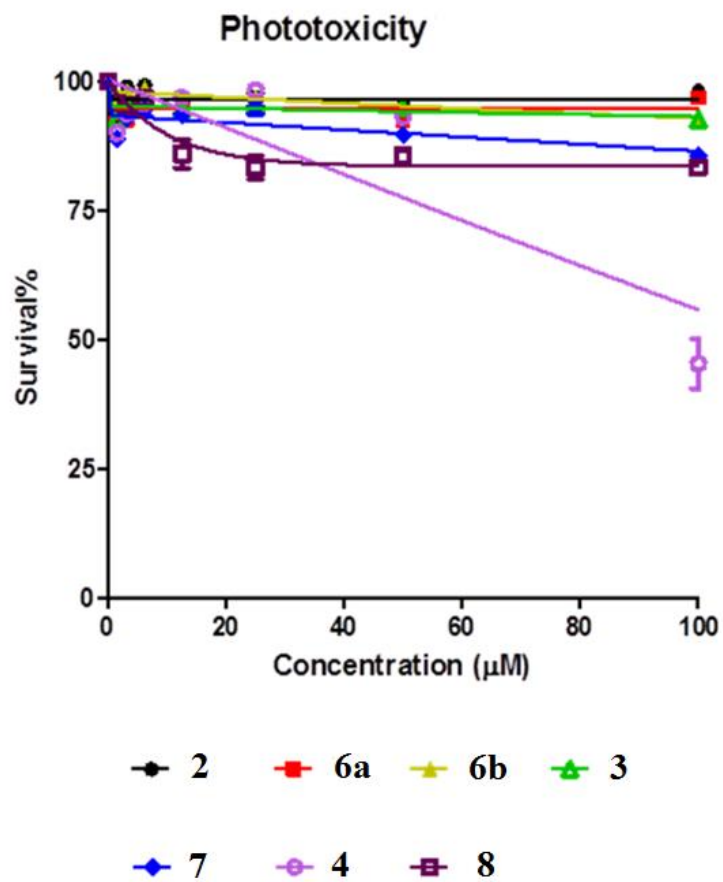

**Figure S42.** Concentration dependent phototoxicity ( $1.5 \text{ J/cm}^2$  light dose) of BODIPYs in HEp2 cells.



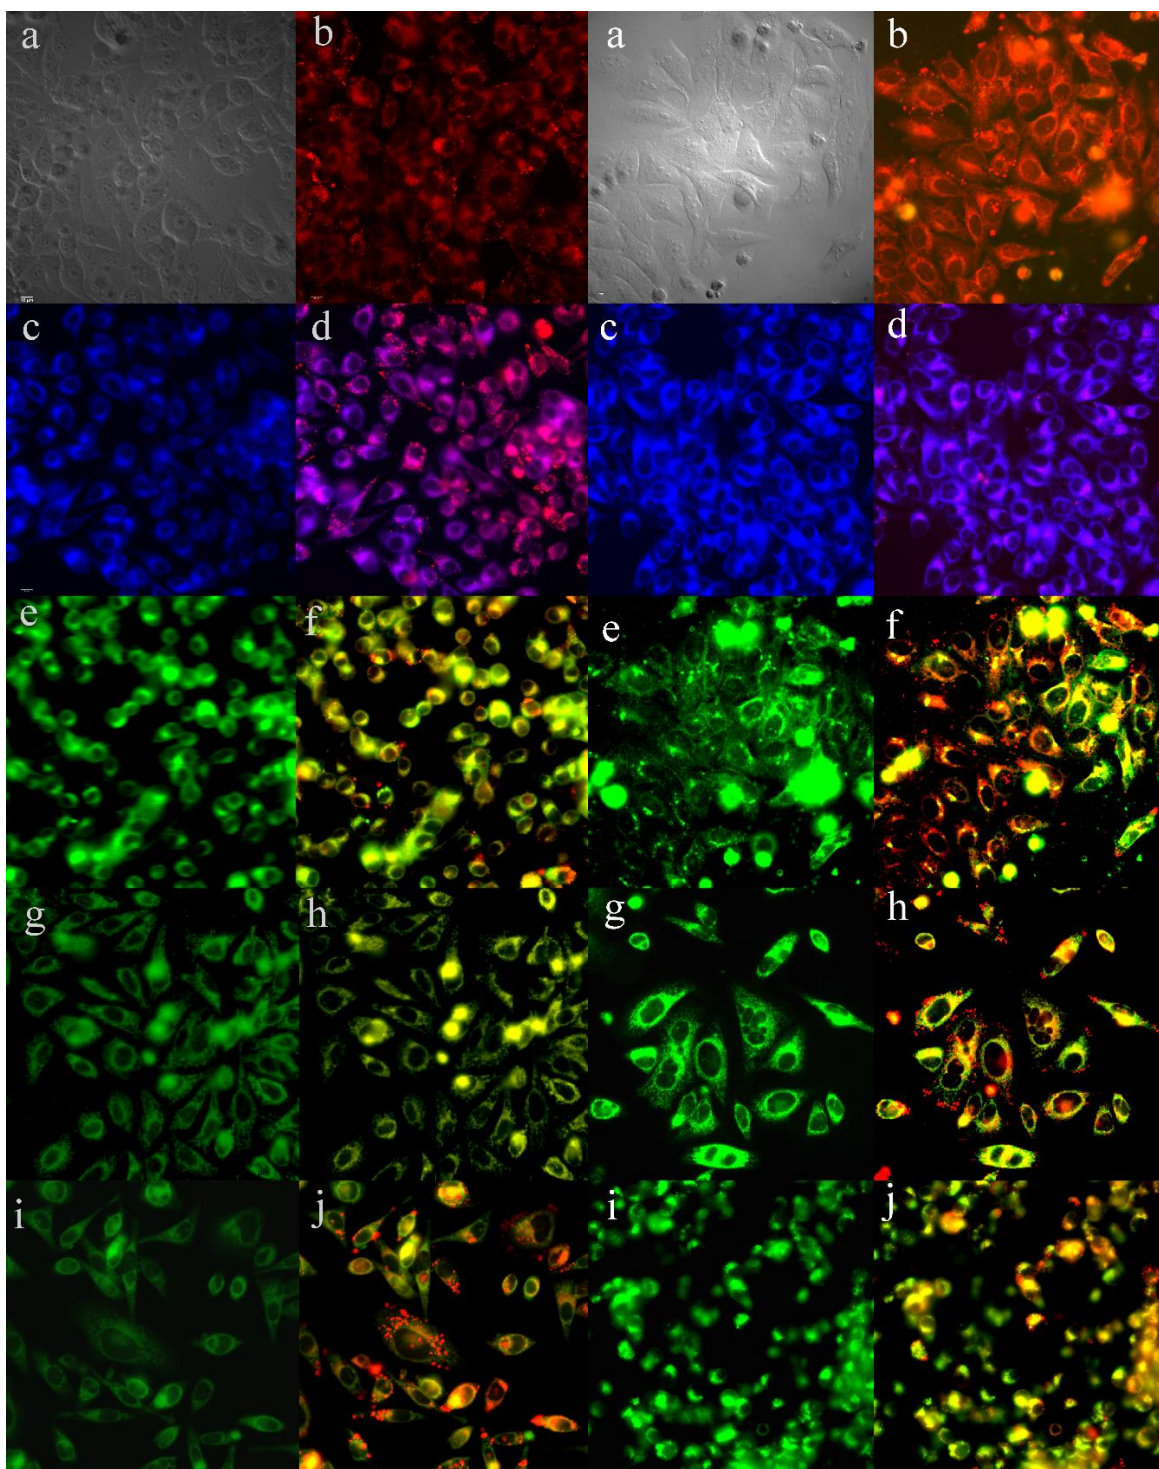

**Figure S43.** Subcellular localization of **2** (left) and **3** (right) in HEp2 cells at 10  $\mu\text{M}$  for 6 h. (a) phase contrast, (b) overlay of BODIPY and phase contrast, (c) ER Tracker Blue/White, (d) overlay of BODIPY and ER Tracker, (e) BODIPY Ceramide, (f) overlay of BODIPY and BODIPY Ceramide, (g) MitoTracker Green, (h) overlay of BODIPY and MitoTracker, (i) LysoSensor Green, (j) overlay of BODIPY and LysoSensor Green. Scale bar: 10  $\mu\text{m}$ .

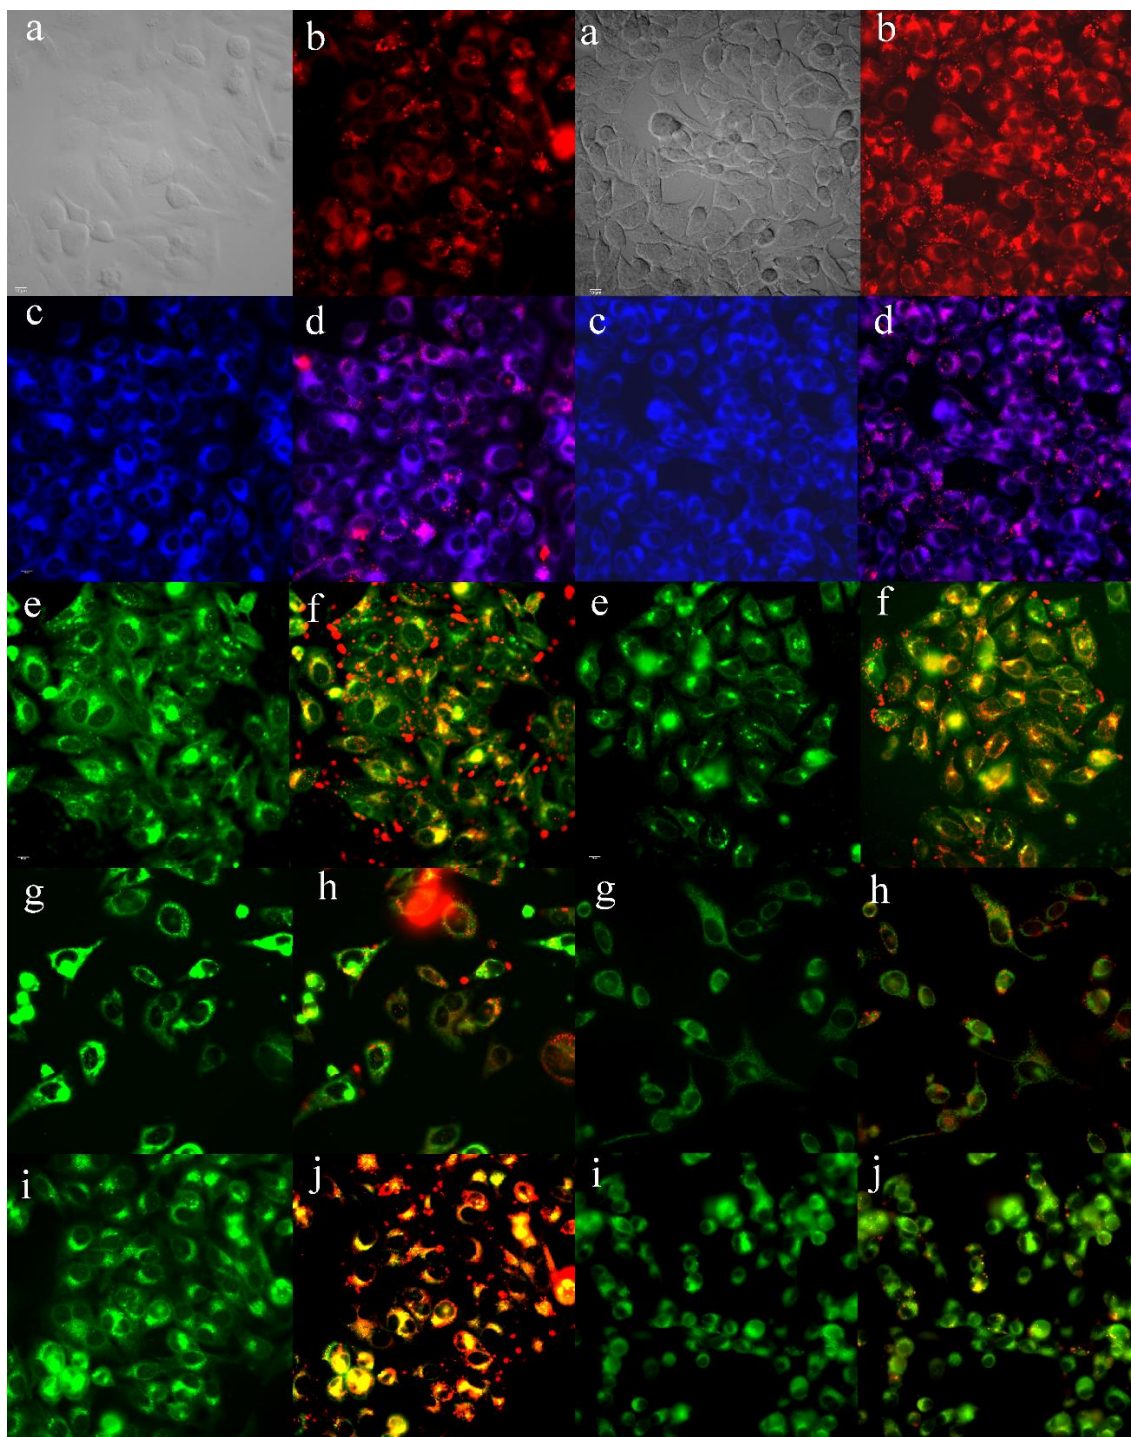

**Figure S44.** Subcellular localization of **4** (left) and **6a** (right) in HEp2 cells at 10  $\mu\text{M}$  for 6 h. (a) phase contrast, (b) overlay of BODIPY and phase contrast, (c) ER Tracker Blue/White, (d) overlay of BODIPY and ER Tracker, (e) BODIPY Ceramide, (f) overlay of BODIPY and BODIPY Ceramide, (g) MitoTracker Green, (h) overlay of BODIPY and MitoTracker, (i) LysoSensor Green, (j) overlay of BODIPY and LysoSensor Green. Scale bar: 10  $\mu\text{m}$ .

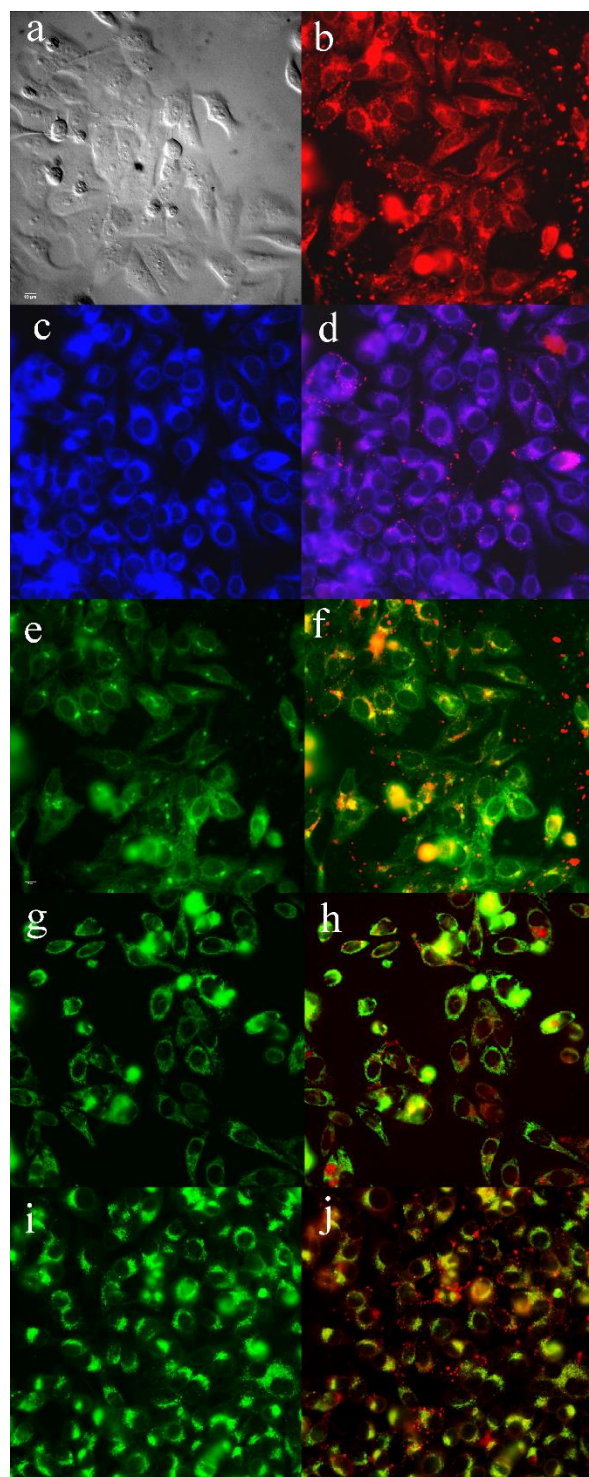

**Figure S45.** Subcellular localization of **7** in Hep2 cells at 10  $\mu$ M for 6 h. (a) phase contrast, (b) overlay of BODIPY and phase contrast, (c) ER Tracker Blue/White, (d) overlay of BODIPY and ER Tracker, (e) BODIPY Ceramide, (f) overlay of BODIPY and BODIPY Ceramide, (g) MitoTracker Green, (h) overlay of BODIPY and MitoTracker, (i) LysoSensor Green, (j) overlay of BODIPY and LysoSensor Green. Scale bar: 10  $\mu$ m.

Table S3. Major (+++) and Minor (+) Subcellular Sites of Localization in HEp2 Cells

| compd.    | Er  | Golgi | Mito | Lys |
|-----------|-----|-------|------|-----|
| <b>2</b>  | +++ | +++   | ++   | +++ |
| <b>6a</b> | ++  | ++    | +    | +   |
| <b>6b</b> | +++ | +++   | ++   | ++  |
| <b>3</b>  | ++  | +++   | +++  | +++ |
| <b>7</b>  | +++ | ++    | +    | ++  |
| <b>4</b>  | ++  | ++    | +    | +++ |
| <b>8</b>  | ++  | ++    | +    | +   |
